# Supplementary material
Source: PubMed Central journal article supplement (PMC8832480)
Supplement: 10.1182-2021011941_bloodbld2021011516-suppl1.pdf [file 10.1182-2021011941_bloodbld2021011516-suppl1.pdf]

## Materials and methods

### Kinase activity assay:

Vecabrutinib interaction with the kinase domain of BTK was characterized by X-crystallography and mass spectrometry. Vecabrutinib protein kinase selectivity and kinase inhibitory activities were evaluated in the KinaseProfiler™ panel of 234 individual kinases (Eurofins Pharma Discovery Services, Dundee, UK). Vecabrutinib was also evaluated in a direct kinase assay for activity against BTK wild-type (WT) or BTK with a C481S mutation. Briefly, 170 pM WT His-BTK full-length protein (Thermo Fischer) or 1nM His-BTK C481S (expressed in Sf9 cells and purified using Ni-NTA affinity resin and size exclusion chromatography) were incubated with vecabrutinib or DMSO for 30 min. Kinase reactions were conducted in 10mM Tris/HCl, pH7.5, 10mM MgCl<sub>2</sub>, 0.01% (v/v) Triton X-100, and 1mM DTT containing 15μM fluorescein-poly-Glu-Tyr (Thermo Fisher) and 50μM ATP. One hour later, reactions were stopped upon addition of 10mM EDTA and 3nM Tb-labelled pY20 antibody (Thermo Fisher). After 30 minutes, fluorescence was measured at 485nm and 520nm after excitation at 340nm using a Tecan Infinite F500 plate reader. Titration curves were generated using average FRET ratios from triplicate data points and fit with GraphPad Prism to determine the IC<sub>50</sub> values.

### Cell line models:

Chicken DT40 B cells (Cell Engineering Division, RIKEN BioResource Center, Japan) were cultured at 37 °C in a humidified atmosphere of 90 % air and 10 % CO<sub>2</sub> in RPMI 1640 medium (Gibco), supplemented with 10 % (v/v) heat-inactivated fetal calf serum (FCS), 1 % heat-inactivated chicken serum, 2 mM L-glutamine, 50 μM β-mercaptoethanol, 100 units/ml penicillin, and 100 μg/ml streptomycin. COS-7 cells (DSMZ, Germany) were maintained at 37 °C in a humidified atmosphere of 90 % air and 10 % CO<sub>2</sub> in Dulbecco's modified Eagle's medium (Invitrogen), supplemented with 10 % (v/v) FCS (Invitrogen), 2 mM glutamine, 100 units/ml penicillin, and 100 μg/ml streptomycin. Jeko-1 cells (DSMZ) and murine primary Eμ-TCL1 tumors used *in vitro* for drug sensitivity assays were cultured at 37 °C in a humidified atmosphere of 95 % air and 5 % CO<sub>2</sub> in RPMI 1640 containing 20 % and 10 % FCS, respectively, 2 mM glutamine, 100 units/ml penicillin, and 100 μg/ml streptomycin.

### Primary CLL patient samples:

Patient cohort given in Suppl. table 3 which included n=8 BTK wt samples and n=4 BTK C481S mutant samples were included for the analysis of drug impact on viability and apoptotic priming by BH3 profiling. The patient cohort in suppl. table 4 was used for studying drug impact on T-cells. Genomic aberrations were analyzed using FISH<sup>1</sup>. IGHV gene mutations status was analyzed as previously described<sup>2</sup>. The analyses were conducted in accordance with the Declaration of Helsinki, approved by our institutional review board, and informed consent was obtained from all patients.

### Cloning of cDNAs encoding WT and mutant BTK and PLC $\gamma$ <sub>2</sub> and lentiviral transduction:

Complementary DNAs encoding WT and C481S mutant human BTK were cloned into the pSFLV-GFP vector, while the cDNAs encoding WT and R665W mutant human PLC $\gamma$ <sub>2</sub> were cloned into the pLVX-EF1 $\alpha$ -IRES-Puro vector. Production of lentivirus was performed as described using the lentiX lentiviral expression system (Clontech) following the manufacturer's instructions. For packaging of the virus, a viral packaging vector (pAX2) and an envelope vector for the virus (pMD2) were used. Viruses harvested 24 and 48 h after transfection were used for transduction of JeKo-1 cells. The cells were infected for 12 h, after which the virus was removed and the cells were allowed to recover for 2 days. Selection of WT- and mutant-PLC $\gamma$ <sub>2</sub>-transduced cells was performed by using 0.25  $\mu$ g/ml puromycin, followed by seeding single cells in a 96-well plate. Clones resistant to puromycin were screened for PLC $\gamma$ <sub>2</sub> protein expression using Western blotting and used for further experiments. BTK-WT- and -mutant-transduced cells were expanded and subsequently selected by sorting for GFP expression using a BD FACS Aria II cell sorter.

### Analysis of inositol phosphate formation in transfected COS-7 cells and generation of stably transfected DT40 cells:

Transfection of COS-7 cells, radiolabelling of inositol phospholipids and analysis of inositol phosphate formation was done as described in [Wist et al., 2020]. The generation of stably transfected DT40 cell clones expressing WT or C481S mutant

human BTK was essentially done as described in [Walliser et al., 2015] except that BTK-deficient DT40 cells (J. Wienands, Institute of Cellular and Molecular Immunology, University of Göttingen) were used as recipients. Proteomic analysis of whole cell extract proteins, fractionated by SDS-PAGE, was used to verify the expression of WT and C481S variant BTK in the respective cell clones. MS/MS spectra were correlated with the UniProt chicken database complemented with the sequences of human WT and C481S variant BTK. Carbamidomethylated cysteine was considered as a fixed modification along with oxidation (M), and acetylated protein N-termini as variable modifications. False discovery rates were set, both on peptide and protein levels, to 0.01.

#### Analysis of cytosolic Ca<sup>2+</sup> by flow cytometry:

Two cell populations were analyzed simultaneously by staining half of the cells ( $1.8 \times 10^7$  cells) for 10 min at 37 °C and 10 % CO<sub>2</sub> at a density of  $10^7$  cells/ml with 20 nM CFSE in PBS, followed by washing of the cells once with 10 ml of PBS<sup>3</sup>. For BTK inhibitor treatment, unstained and CFSE- labeled DT40 cells were treated for 1 h at 37 °C with continuous shaking at a density of  $10^7$  cells/ml with 1 μM of the inhibitor or solvent in RPMI medium containing supplements. The irreversible inhibitors were washed out before adding the Ca<sup>2+</sup> indicator, whereas the reversible inhibitors were continuously present. Cells were then suspended at a density of  $10^7$  cells/ml in FACS buffer (143 mM NaCl, 6 mM KCl, 1 mM MgSO<sub>4</sub>, 20 mM HEPES/NaOH, pH 7.4, 1 mM CaCl<sub>2</sub>, and 5.6 mM glucose) and incubated for 45 min at 37 °C and 10 % CO<sub>2</sub> with 5 μM Indo-1-AM. The Ca<sup>2+</sup> measurements were performed on a BD FACS Celesta™. In brief,  $10^6$  cells per sample in 0.5 ml of FACS buffer were pre-warmed for 10 min at 37 °C. Next, the baseline intracellular, cytosolic Ca<sup>2+</sup> concentration ([Ca<sup>2+</sup>]<sub>i</sub>) was measured for 2 min before addition of 1 μg/ml anti-chicken IgM. After an additional 4 min, 2 μM ionomycin (I0634, Sigma) was added to the samples to obtain the maximal [Ca<sup>2+</sup>]<sub>i</sub>. Cells were kept at 37 °C prior and during their injection from the sample tube into the flow cytometer instrument. The fluorescence ratio of Indo-1 violet (emission wavelength about 400 nm, Ca<sup>2+</sup>-bound) to Indo-1 blue (emission wavelength about 475 nm; Ca<sup>2+</sup>-free) following excitation at about 355 nm was measured by using FACSDiva™ software (BD Biosciences).

For data evaluation, the experimental results recorded in the .fcs files generated by the FACSDiva™ software (BD Biosciences) were imported into the FlowPy Python tool (<http://flowpy.wikidot.com>) and then transferred to Excel spread sheets. In experiments analyzing two cell populations at the same time, DT40 cells expressing WT BTK (unstained), and DT40 cells expressing BTKC481S (stained), the matrix was fractionated into two parts, M1 and M2, according to the fluorescence intensities determined for intracellular CFSE. The individual points shown in Fig. 2c correspond to the times in full seconds vs. the medians of all fluorescence ratios representing  $[Ca^{2+}]_i$ , following their correction for basal fluorescence intensity in the absence of anti-IgM and normalization according to the maximal values reached after addition of 2  $\mu$ M ionomycin. Between serial measurements, the latter values were normalized to 100 % of the two maxima obtained in the two untreated control cell preparations. Nonlinear least squares curve fitting of selected portions of the data to equations of either a first-order invasion and first-order elimination process (Bateman; response to anti-IgM) or a simple hyperbolic saturation function (response to ionomycin), in both cases allowing for different lag periods after the addition of the stimuli during the curve-fitting processes, was done using GraphPad Prism®, versions 8.4.3 or 4.03, to determine the values corresponding to the maximal  $[Ca^{2+}]_i$  concentrations for normalization to allow for quantitative comparison between experiments.

#### Flow cytometric analysis of BCR cell surface expression:

The cells ( $1 \times 10^7$  cells) were washed once with 2.2 ml PBS and then incubated for 30 min at 4 °C at a density of  $2 \times 10^7$  cells/ml with increasing concentrations (0.1, 0.2, 0.5, 1, 2, 5, 10, and 20  $\mu$ g/ml) of FITC-conjugated mouse anti-chicken IgM or FITC-conjugated mouse IgG<sub>2b</sub> isotype control in PBS (Southern Biotech), as recommended by the manufacturer. Fluorescence intensity of  $5 \times 10^3$  cells was measured on BD FACS Celesta™ using FACSDiva™ software (BD Biosciences). The medians of fluorescence intensities were calculated using the FlowJo software V. 9.3.2 and normalized to the median of the isotype control. The data was fit by nonlinear least-squares curve fitting to a three-parameter sigmoidal-dose response using GraphPad Prism®, version 4.03. The global curve fitting procedure contained in Prism was used to decide between a three- and a four-parameter sigmoidal dose-response model and

to determine whether the best fit values of selected parameters differed between data sets. The simpler model was selected unless the extra sum of squares F-test had a p value of less than 0.05.

### BH3 profiling

Mitochondrial BH3 profiling was carried out as described earlier (Seyfried, CDDis 2019, Montero Cancer Cell 2015). For baseline BH3 profiling, tumor cells were obtained from the E $\mu$ -TCL1 model from spleens of mice treated with vehicle, vecabrutinib or ibrutinib. For dynamic BH3 profiling, primary patient CLL samples were cultured ex vivo for 16 hours in RPMI 1640 supplemented with 20% FCS and exposed to DMSO control, 1  $\mu$ M vecabrutinib or 1  $\mu$ M ibrutinib.

Cells were stained with the fixable viability dye Zombie Violet (423113, Biolegend) for 15 minutes (1:1000) in PBS at room temperature. The cells were then permeabilized with digitonin (0.002%) and exposed for 60 minutes to the BH3-peptides (murine samples: 1  $\mu$ M, 0.3  $\mu$ M and 0.1  $\mu$ M of BIM peptide, 10  $\mu$ M and 3  $\mu$ M of BAD, HRK and MS1 peptide; patient samples: 0.1  $\mu$ M, 0.3  $\mu$ M and 1  $\mu$ M of BAD), a DMSO negative control and 25  $\mu$ M alamethicin (BML-A150-0005, Enzo) serving as positive control for released cytochrome c. After peptide-exposure, cells were fixed in paraformaldehyde for 10 minutes and then incubated in N2 buffer for 10 minutes. Cytochrome c staining (612308, Biolegend) was performed overnight at 4°C. Samples were measured on a CytoFLEX XS flow cytometer (Beckman Coulter) and the data was analyzed using FlowJo 10.7.1 (Becton Dickinson). For the dynamic BH3 profiling, delta priming to vecabrutinib and ibrutinib was calculated as the change in the cytochrome c release of treated compared with control-treated cells.

### Stimulation of splenocytes with soluble anti-CD3 antibody:

TCR activation and analysis was performed as reported earlier<sup>4</sup>. Briefly, single cell suspensions of the splenocytes were prepared and RBCs were lysed and removed using the RBC lysis buffer (Invitrogen).  $2 \times 10^5$  cells were seeded in triplicates into U bottom 96 well plates and pretreated for 1 h at 37 °C with ibrutinib, vecabrutinib, or tirabrutinib. TCR stimulation was performed by adding 1  $\mu$ g/ml anti-CD3 $\epsilon$  monoclonal

antibody (eBioscience) and incubating for 3 h at 37°C in a humidified atmosphere of 95 % air and 5 % CO<sub>2</sub>. The cells were washed by centrifuging the 96 well plate and resuspending the pellets in 100 µl of ice-cold PBS. The cells from the 3 wells were pooled into a single well of a 96 well plate and stained for 30 minutes at 4 °C with TCRβ antibody to detect TCR internalization following CD3 stimulation along other antibodies for cell surface markers and eBioscience™ Fixable Viability Dye eFluor® (ThermoFisher Scientific). After washing, the cells were fixed and permeabilized using Foxp3 / Transcription Factor Staining Buffer Set (eBioscience™) and stained for Foxp3<sup>+</sup> regulatory T-cells (Tregs) and Nur77, the immediate early TCR signaling component, to detect TCR activation. The cells were analysed using a 96 well plate format Cytoflex flow cytometer.

#### Analysis of T-cell function:

The impact of vecabrutinib and ibrutinib treatment on T-cell functions was analysed by assessing cytokine release and granzyme B production of CD8<sup>+</sup> T-cells as previously described<sup>4</sup>. Cells were suspended in DMEM supplemented with 10 % FCS, 10 mM HEPES/NaOH, pH 7.4, 1 mM sodium pyruvate, and 0.1 % (v/v) β-mercaptoethanol, and seeded at a density of 2 × 10<sup>6</sup> cells/well into a 96 well U bottom plate. The cells were incubated for 6 h at 37 °C and 5 % CO<sub>2</sub> in Cell Stimulation Cocktail (eBioscience), containing PMA and ionomycin as stimuli and the protein transport inhibitors brefeldin A and monensin. The cells were then washed and incubated with fluorescent labelled antibodies for surface proteins along with eBioscience™ Fixable Viability Dye eFluor® (ThermoFisher Scientific) for 30 minutes at 4°C. Fluorescently labelled antibodies were used for the different cytokines and granzyme B after fixing and permeabilizing the cells using eBioscience™ Intracellular Fixation Buffer (ThermoFisher Scientific) for 30 minutes at room temperature. The cells were then analyzed using flow cytometry.

#### Analysis of drug impact on T-cells from CLL patients:

Peripheral blood mononuclear cells (PBMCs) were isolated by Ficoll (Biochrom) density gradient centrifugation. PBMCs were viably frozen and when needed, frozen PBMCs were thawed. 3 × 10<sup>6</sup> PBMCs were seeded into U bottom 96 well plates. TCR

stimulation was performed by 1 µg/ml anti-CD3 or a combination of 1 µg/ml anti-CD3 (clone UCHT1, Biolegend) and 2µg/ml anti-CD28 (clone 28.2, Biolegend) antibodies in the presence of DMSO as vehicle control or ibrutinib, vecabrutinib, or tirabrutinib at a concentration of 1µM for 48h at 37°C and 5 % CO<sub>2</sub>. For flow cytometric analyses, cells were washed with PBS and stained for 30 minutes at 4 °C with eBioscience™ Fixable Viability Dye eFluor® (ThermoFisher Scientific) as well as fluorescently labelled antibodies against surface markers. Cells were fixed using eBioscience™ Intracellular Fixation Buffer (ThermoFisher Scientific) for 30min at room temperature, washed and stored at 4°C in the dark until data acquisition.

#### Effect of BTK inhibitors on isolated T-cells:

T-cells were isolated from NR4A1-GFP mouse splenocytes after Ficoll using EasySep™ Mouse T cell isolation kit (Stemcell) according to the manufacturer's instructions. Human T-cells were isolated from PBMCs of healthy individuals using EasySep™ Human T cell isolation kit (Stemcell). The isolated T-cells were treated with DMSO or 1µM and / or 5µM of ibrutinib, vecabrutinib or tirabrutinib. The isolated murine and human T-cells were activated using Dynabeads™ Mouse T-Activator CD3/CD28 and Dynabeads™ Human T-Activator CD3/CD28 beads, respectively. The cells were incubated for 6 h at 37°C in a humidified atmosphere of 95 % air and 5 % CO<sub>2</sub>, following which the cells were stained for 30 minutes at 4 °C with CD25, CD69 along with T-cell markers CD3, CD4 and CD8. The cells were fixed using IC fixation buffer (eBioscience) and analysed using flow cytometry. For analysis of proliferation, the human T-cells were stained using the cell proliferation dye eFluor™ 670, followed by treatment with the inhibitors as mentioned above and stimulation with Dynabeads™ Human T-Activator CD3/CD28 for 72 hours at 37°C in a humidified atmosphere of 95 % air and 5 % CO<sub>2</sub>. The cells were then stained for T-cell markers CD3, CD4 and CD8 for 30 minutes at 4 °C, fixed using IC fixation buffer (eBioscience) and analysed using flow cytometry.

#### DiOC<sub>6</sub>/PI staining to determine cell viability:

Loss of mitochondrial transmembrane potential following drug treatment was assessed using DiOC<sub>6</sub>/PI staining and FACS. Splenocytes isolated from leukemic recipient mice were purified using Ficoll density gradient centrifugation (Biochrom and Sigma). The isolated mononuclear cells were cultured in RPMI 1640 containing 10 % FCS, 2 mM glutamine, 100 units/ml penicillin, and 100 µg/ml streptomycin at a density of 10<sup>5</sup> cells per well in a U bottom 96 well plate and treated with different concentrations of ibrutinib, vecabrutinib or venetoclax as single agents or in combination with 1 µM venetoclax. For analysing drug impact on human CLL cell viability assay, cells purified by Ficoll density gradient centrifugation (Biochrom and Sigma) were cultured in 96 well plates in 50% of HS5 conditioned medium and 50% of RPMI 1640 containing 20% FCS, 2 mM glutamine, 100 units/ml penicillin, and 100 µg/ml streptomycin and treated with the inhibitors or DMSO control and incubated at 37°C in a humidified atmosphere of 95 % air and 5 % CO<sub>2</sub>. After drug treatment for 4 days, the cells were stained for 20 minutes at 37 °C with 45 nM DiOC<sub>6</sub> (Sigma Aldrich) in RPMI 1640 with 0.5 % (w/v) BSA. The cells were then centrifuged and resuspended in FACS staining buffer (PBS with 2 % (v/v) FBS) containing 2 µg/ml PI and then analysed by with FACS immediately. Percentage viability was calculated by normalizing the DiOC<sub>6</sub><sup>+</sup> PI<sup>-</sup> populations in the inhibitor-treated samples to those treated with the vehicle containing DMSO.

#### Statistical tests and quantifications:

Statistical analyses were performed using GraphPad Prism<sup>®</sup>, version 6.0. For non-normally distributed data sets, the non-parametric Mann-Whitney U test was used. Paired variables were compared using the paired Student's T-test. Survival curves were analysed using the log-rank-test (Mantel-Cox). Statistical significance was defined as P < 0.05. In figures, \*P ≤ 0.05; \*\*P ≤ 0.01; \*\*\*P ≤ 0.0001; ns, P > 0.05.



### Materials:

For western blotting, rabbit polyclonal antibody reactive against human and chicken BTK (F52632) was obtained from NSJ Bioreagents. The rabbit polyclonal antibody reactive against human and chicken PLC $\gamma$ <sub>2</sub> (#3872) was purchased from Cell Signaling. Mouse monoclonal antibody reactive against human and chicken  $\beta$ -Actin (#A5441) was from Sigma-Aldrich. Antibodies used for western blot on murine CLL cells isolated from vecabrutinib, ibrutinib or vehicle treated mice for apoptotic proteins include, BCL-xl (sc-8392), BCL2 (sc-492), BAX (sc-23959),  $\beta$ -actin (sc-47778) and Lamin b (sc-6216) purchased from Santa Cruz Biotechnology, phospho-BAD (9296s), BAD (9292s) and BIM (2933s) from Cell Signaling Technology, MCL1 (AP 1312a) from Abgent and  $\alpha$ -tubulin from Abcam. Antibodies used for flow cytometry are listed in Suppl. Table. 1. q-RT PCR was performed as described before<sup>5</sup>. The sequences of primers used for the qPCR are given in Suppl. Table. 2. CFSE (eBioscience™, 65-0850-84) and Indo-1- AM (I1223) were from Thermo Fisher Scientific. The BTK inhibitors ibrutinib (PCI-32765) and vecabrutinib (SNS-062) were purchased from Selleckchem and kindly provided by Sunesis, respectively.

### References:

1. Döhner H, Stilgenbauer S, Benner A, et al. Genomic aberrations and survival in chronic lymphocytic leukemia. *N. Engl. J. Med.* 2000;343(26):1910–6.
2. Stilgenbauer S, Schnaiter A, Paschka P, et al. Gene mutations and treatment outcome in chronic lymphocytic leukemia: results from the CLL8 trial. *Blood.* 2014;123(21):3247–54.
3. Fu G, Gascoigne NRJ. Multiplexed labeling of samples with cell tracking dyes facilitates rapid and accurate internally controlled calcium flux measurement by flow cytometry. *J. Immunol. Methods.* 2009;350(1–2):194–199.
4. Hanna BS, Roessner PM, Scheffold A, et al. PI3K $\delta$  inhibition modulates regulatory and effector T-cell differentiation and function in chronic lymphocytic leukemia. *Leukemia.* 2019;33(6):1427–1438.
5. Scheffold A, Jebaraj BMC, Tausch E, et al. IGF1R as druggable target

mediating PI3K- $\delta$  inhibitor resistance in a murine model of chronic lymphocytic leukemia. *Blood*. 2019;blood.2018881029.

**Suppl. Table 1 List of antibodies used for flow cytometry**

| <b>Antibodies</b>                 | <b>Clone</b> | <b>Supplier</b>  |
|-----------------------------------|--------------|------------------|
| anti-CD19                         | ID3          | eBioscience      |
| anti-CD5                          | 35-7.3       | BD Biosciences   |
| anti-CD3                          | 17A2         | Biolegend        |
| anti-CD4                          | RM4-5        | BD Biosciences   |
| anti-CD8a                         | 53-6.7       | BD Biosciences   |
| anti-CD44                         | IM7          | BD Biosciences   |
| anti-CD127                        | SB/199       | BD Biosciences   |
| anti-CD69                         | H1.2F3       | Biolegend        |
| anti-Ki67                         | B56          | BD Biosciences   |
| anti-CD25                         | PC61         | BD Biosciences   |
| anti-CD103                        | 2E7          | Biolegend        |
| anti-CD357                        | DTA-1        | Biolegend        |
| anti-CD152                        | UC10-4B9     | Biolegend        |
| anti-FOXP3                        | PCH101       | eBioscience      |
| anti-FOXP3                        | FJK-16S      | eBioscience      |
| anti-IL2                          | JES6-SH4     | Biolegend        |
| anti-Granzyme B                   | NGZB         | eBioscience      |
| anti-IFN $\gamma$                 | XMG1.2       | eBioscience      |
| anti- phospho ERK                 | MILAN8R      | eBioscience      |
| anti- Nur77                       | REA704       | Milteny Biotech  |
| anti-TCRbeta                      | H57-597      | BD Biosciences   |
| anti-CD3e                         | 145-2C11     | eBioscience      |
| anti-chicken IgM                  | M-4          | Southern Biotech |
| anti-chicken IgM                  | M-1          | Southern Biotech |
| anti-mouse IgG <sub>2b</sub> iso. | A-1          | Southern Biotech |

**Suppl. Table 1 (continued) List of antibodies used for flow cytometry**

| <b>Antibodies</b> | <b>Clone</b> | <b>Supplier</b> |
|-------------------|--------------|-----------------|
| anti-CD4          | RPA-T4       | BD Biosciences  |
| anti-CD5          | UCHT2        | BD Biosciences  |
| anti-CD8          | SK1          | BD Biosciences  |
| anti-CD4          | SK3          | BD Biosciences  |
| anti-CD19         | H1B19        | BD Biosciences  |
| anti-CD69         | FN50         | Biolegend       |
| anti-CD25         | M-A251       | BD Biosciences  |

**Suppl. Table 2: List of primers used for RT-qPCR based gene expression analysis**

| <b>Gene</b> | <b>Forward primer</b>    | <b>Reverse primer</b>        |
|-------------|--------------------------|------------------------------|
| Bim         | 5'GGAGACCAGTTCAACGAAACTT | 5'AACAGTTGTAAGATAACCATTTGAGG |
| Bid         | 5'GCGTCTGCGTGGTGATT      | 5'TCCCAGTAAGCTTGCACAGG       |
| Bad         | 5'AACAGTCATCATGGAGGCGC   | 5'CCCGCTGGGTACGAACTG         |
| Bax         | 5'GTGAGCGGCTGCTTGTCT     | 5'GGTCCCGAAGTAGGAGAGGA       |
| Bcl2        | 5'GTACCTGAACCGGCATCTG    | 5'GGGGCATATAGTTCCACAA        |
| Mcl1        | 5'AAAGGCGGCTGCATAAGTC    | 5'TCCTCCGGAGACACGATG         |
| Bcl-xl      | 5'TTTGGTGGGACAAGTGCAGGA  | 5'CTGTGAACTCCGCCCAGC         |

**Suppl. Table 3: Patient characteristics of CLL cohort used for study of drug impact on viability and apoptotic priming (BH3 profiling)**

| ID  | Age | Sex | VH        | FISH     | BTK   | Viability assay | BH3 profiling |
|-----|-----|-----|-----------|----------|-------|-----------------|---------------|
| #1  | 74  | M   | Unmutated | Del17p13 | C481S | Yes             | Yes           |
| #2  | 49  | M   | Unmutated | Normal   | C481S | Yes             | Yes           |
| #3  | 57  | M   | n.a.      | n.a.     | C481S | Yes             | No            |
| #4  | 76  | F   | Unmutated | Del13q14 | C481S | Yes             | No            |
| #5  | 63  | F   | n.a.      | Normal   | WT    | Yes             | Yes           |
| #6  | 55  | M   | Unmutated | Normal   | WT    | Yes             | Yes           |
| #7  | 64  | M   | n.a.      | Del13q14 | WT    | Yes             | No            |
| #8  | 71  | M   | Mutated   | Normal   | WT    | Yes             | No            |
| #9  | 53  | F   | Mutated   | Del13q14 | WT    | Yes             | No            |
| #10 | 60  | M   | n.a.      | Del13q14 | WT    | Yes             | Yes           |
| #11 | 53  | M   | Mutated   | Del13q14 | WT    | Yes             | Yes           |
| #12 | 65  | M   | Mutated   | Del13q14 | WT    | Yes             | No            |
| #13 | 55  | M   | Unmutated | Normal   | WT    | No              | Yes           |

**Suppl. Table 4: Patient characteristics of CLL cohort used for analysis of drug impact on T-cells**

| ID  | Age | VH        | FISH       | Stage   |
|-----|-----|-----------|------------|---------|
| #14 | 84  | unmutiert | 13q del    | n.a.    |
| #15 | 61  | unmutiert | Trisomy 12 | Binet C |
| #16 | 54  | unmutiert | Normal     | Binet A |
| #17 | 44  | unmutiert | Del13q14   | Binet A |
| #18 | 82  | mutiert   | Del13q14   | Binet A |
| #19 | 64  | mutiert   | Normal     | Binet A |
| #20 | 69  | mutiert   | Trisomy 12 | Binet A |
| #21 | 60  | mutiert   | Del13q     | Binet A |
| #22 | 82  | mutiert   | Del13q     | Binet A |

**Suppl. Table 5: IC50 values calculated from direct kinase assay (Fig. 1c-1e)**

| <b>IC<sub>50</sub> (nM), [ATP]= 50 μM</b> | <b>WT BTK</b> | <b>C481S BTK</b> | <b>Fold Change</b> |
|-------------------------------------------|---------------|------------------|--------------------|
| Vecabrutinib                              | 4.6           | 1.1              | 0.2                |
| Ibrutinib                                 | 0.1           | 6.6              | 66                 |
| Acalabrutinib                             | 4.2           | 707              | 168                |

**Suppl. Table 6: Kinase inhibition profile of vecabrutinib**

| <b>Kinase</b> | <b>IC50 (nM)</b> |
|---------------|------------------|
| BTK*          | 3                |
| LCK†          | 8                |
| LCK           | 13               |
| ITK*          | 14               |
| TEC†*         | 14               |
| BLK*          | 23               |
| cSRC          | 84               |
| NEK11         | 90               |
| PKG1 $\alpha$ | 184              |
| AURKB         | 191              |
| BMX*          | 224              |
| LYN           | 259              |
| HCK           | 276              |
| ERBB4*        | 317              |
| PKG1 $\beta$  | 327              |
| YES           | 402              |
| TXK*          | 474              |
| FYN           | 651              |
| CHK2          | 823              |
| EGFR*         | 6644             |
| ABL           | > 1000           |
| FLT3          | > 1000           |
| JAK3*         | > 1000           |
| BRK           | >1000            |
| CSK           | >1000            |
| RET           | >1000            |
| FGR           | 500 (Kd)         |

\* Cysteine residue aligning with BTK C481

† Activated



## Suppl. Fig. 1

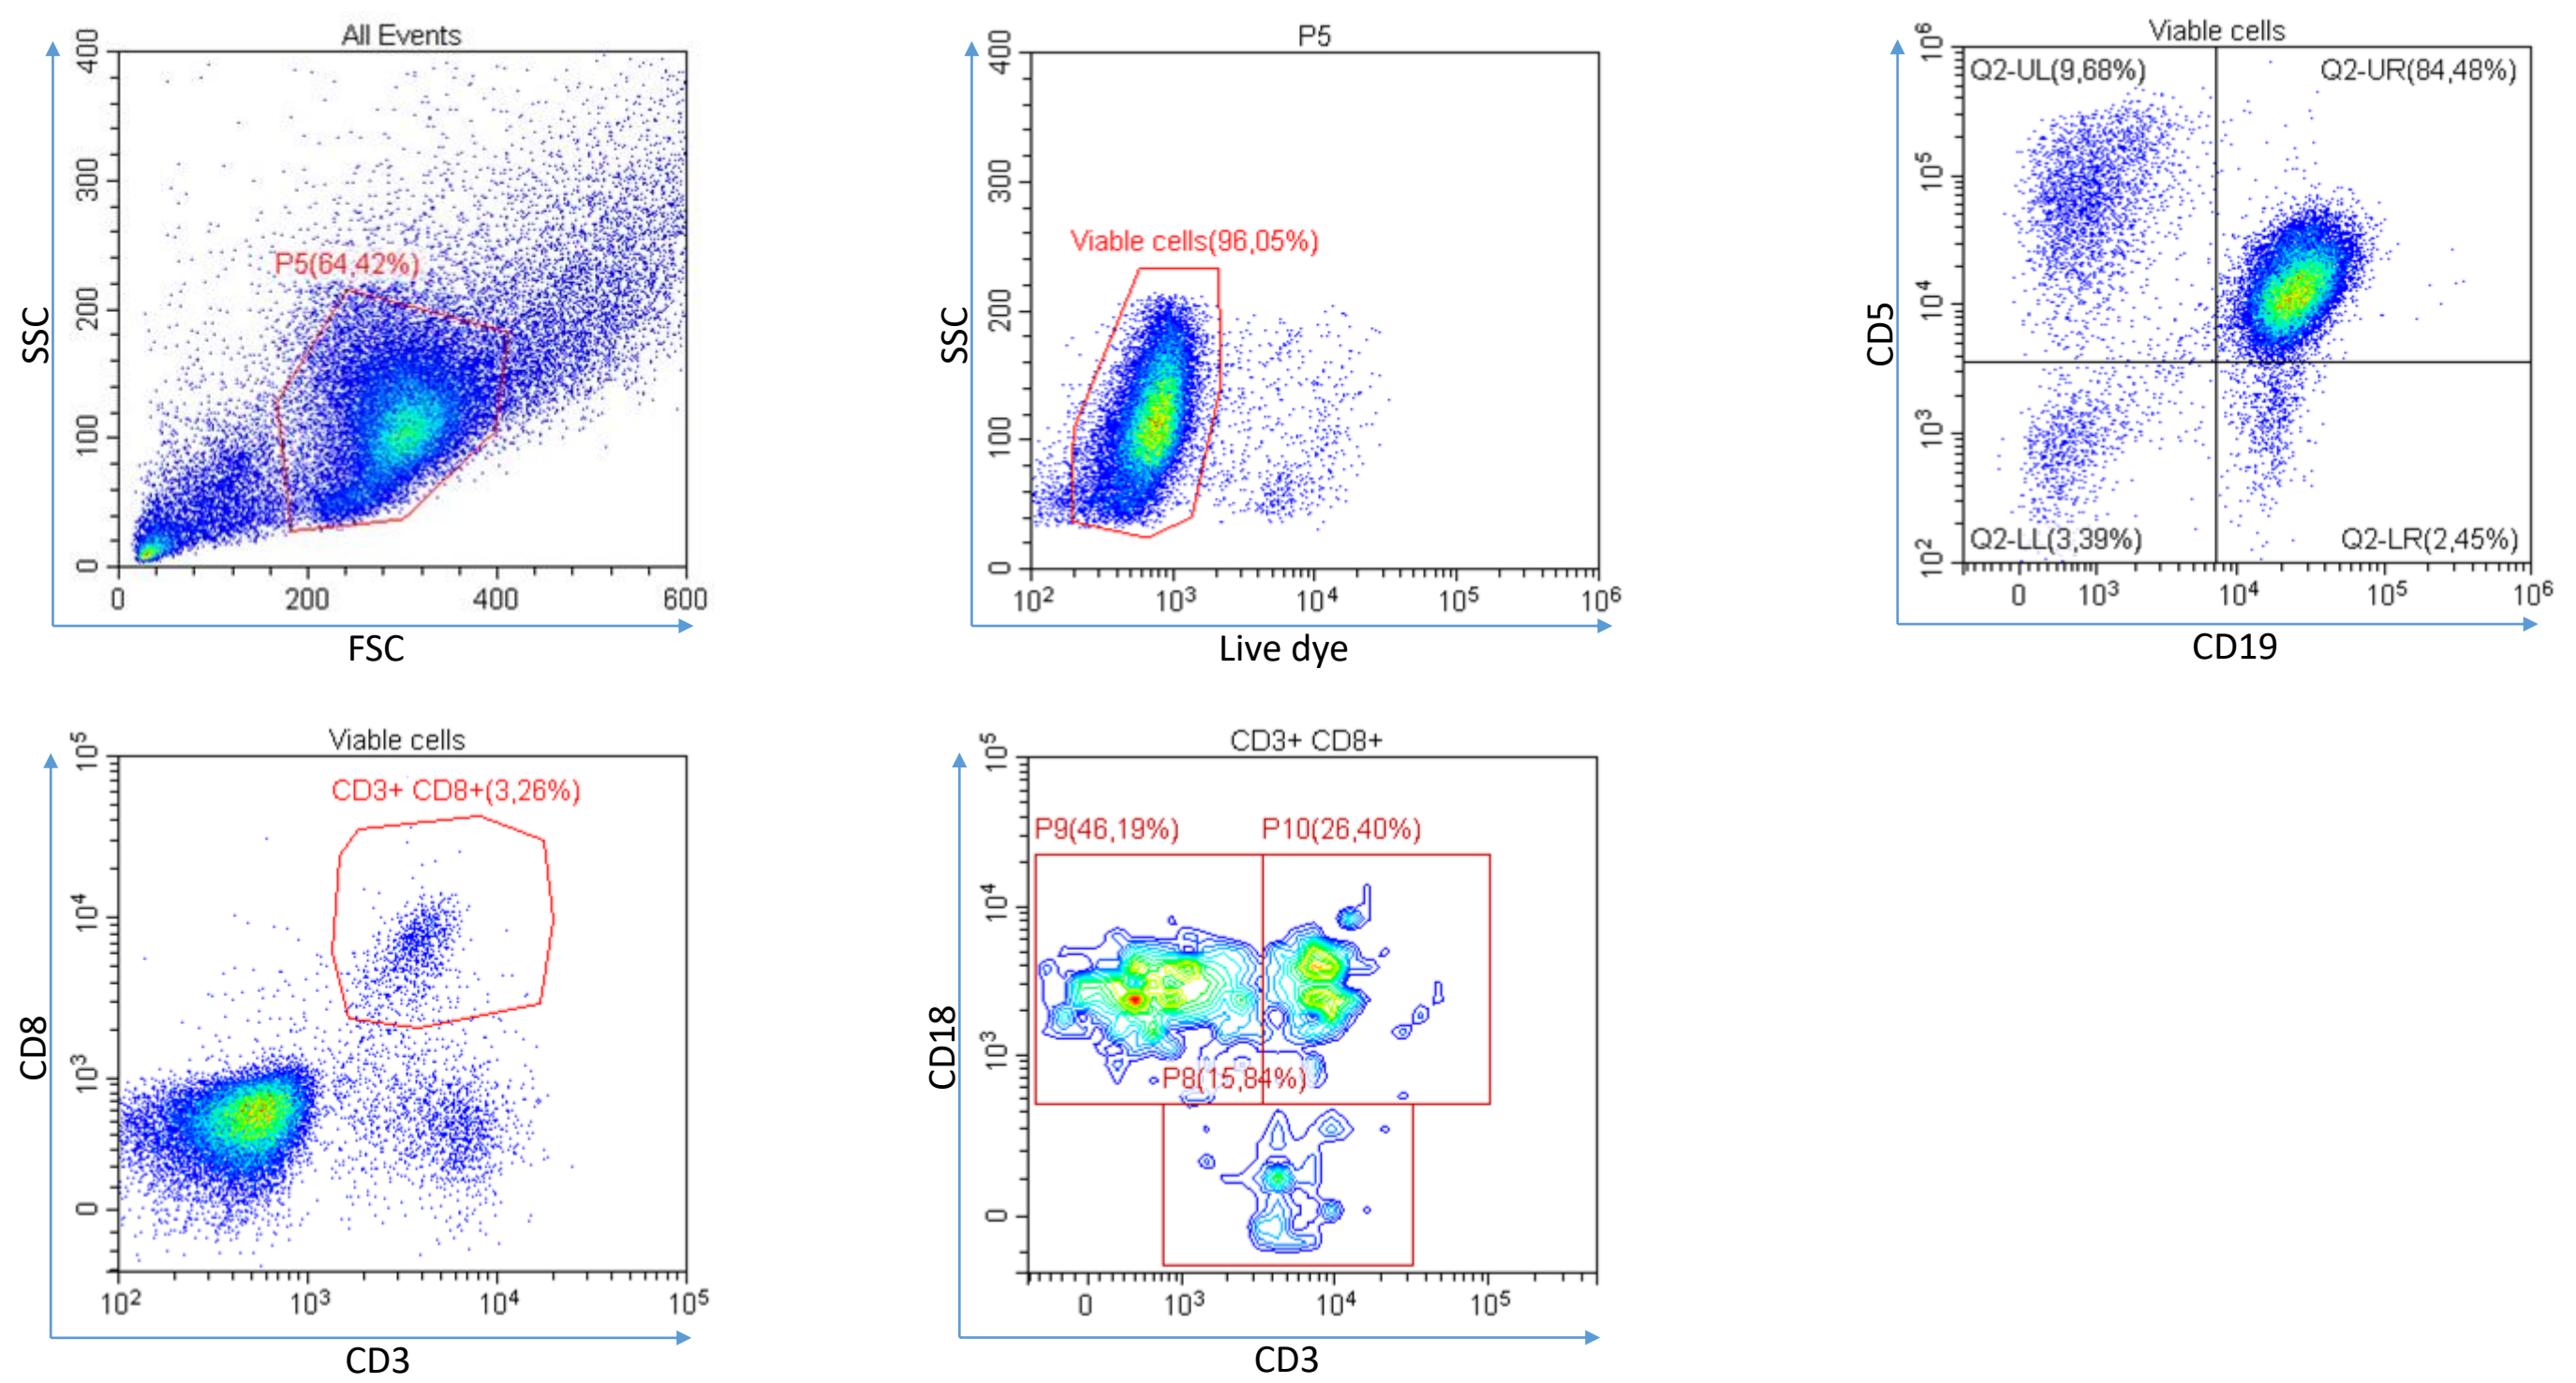

Suppl. Fig. 1: Gating strategy for analysis of CD8+ T cell subsets using FACS

## Suppl. Fig. 2

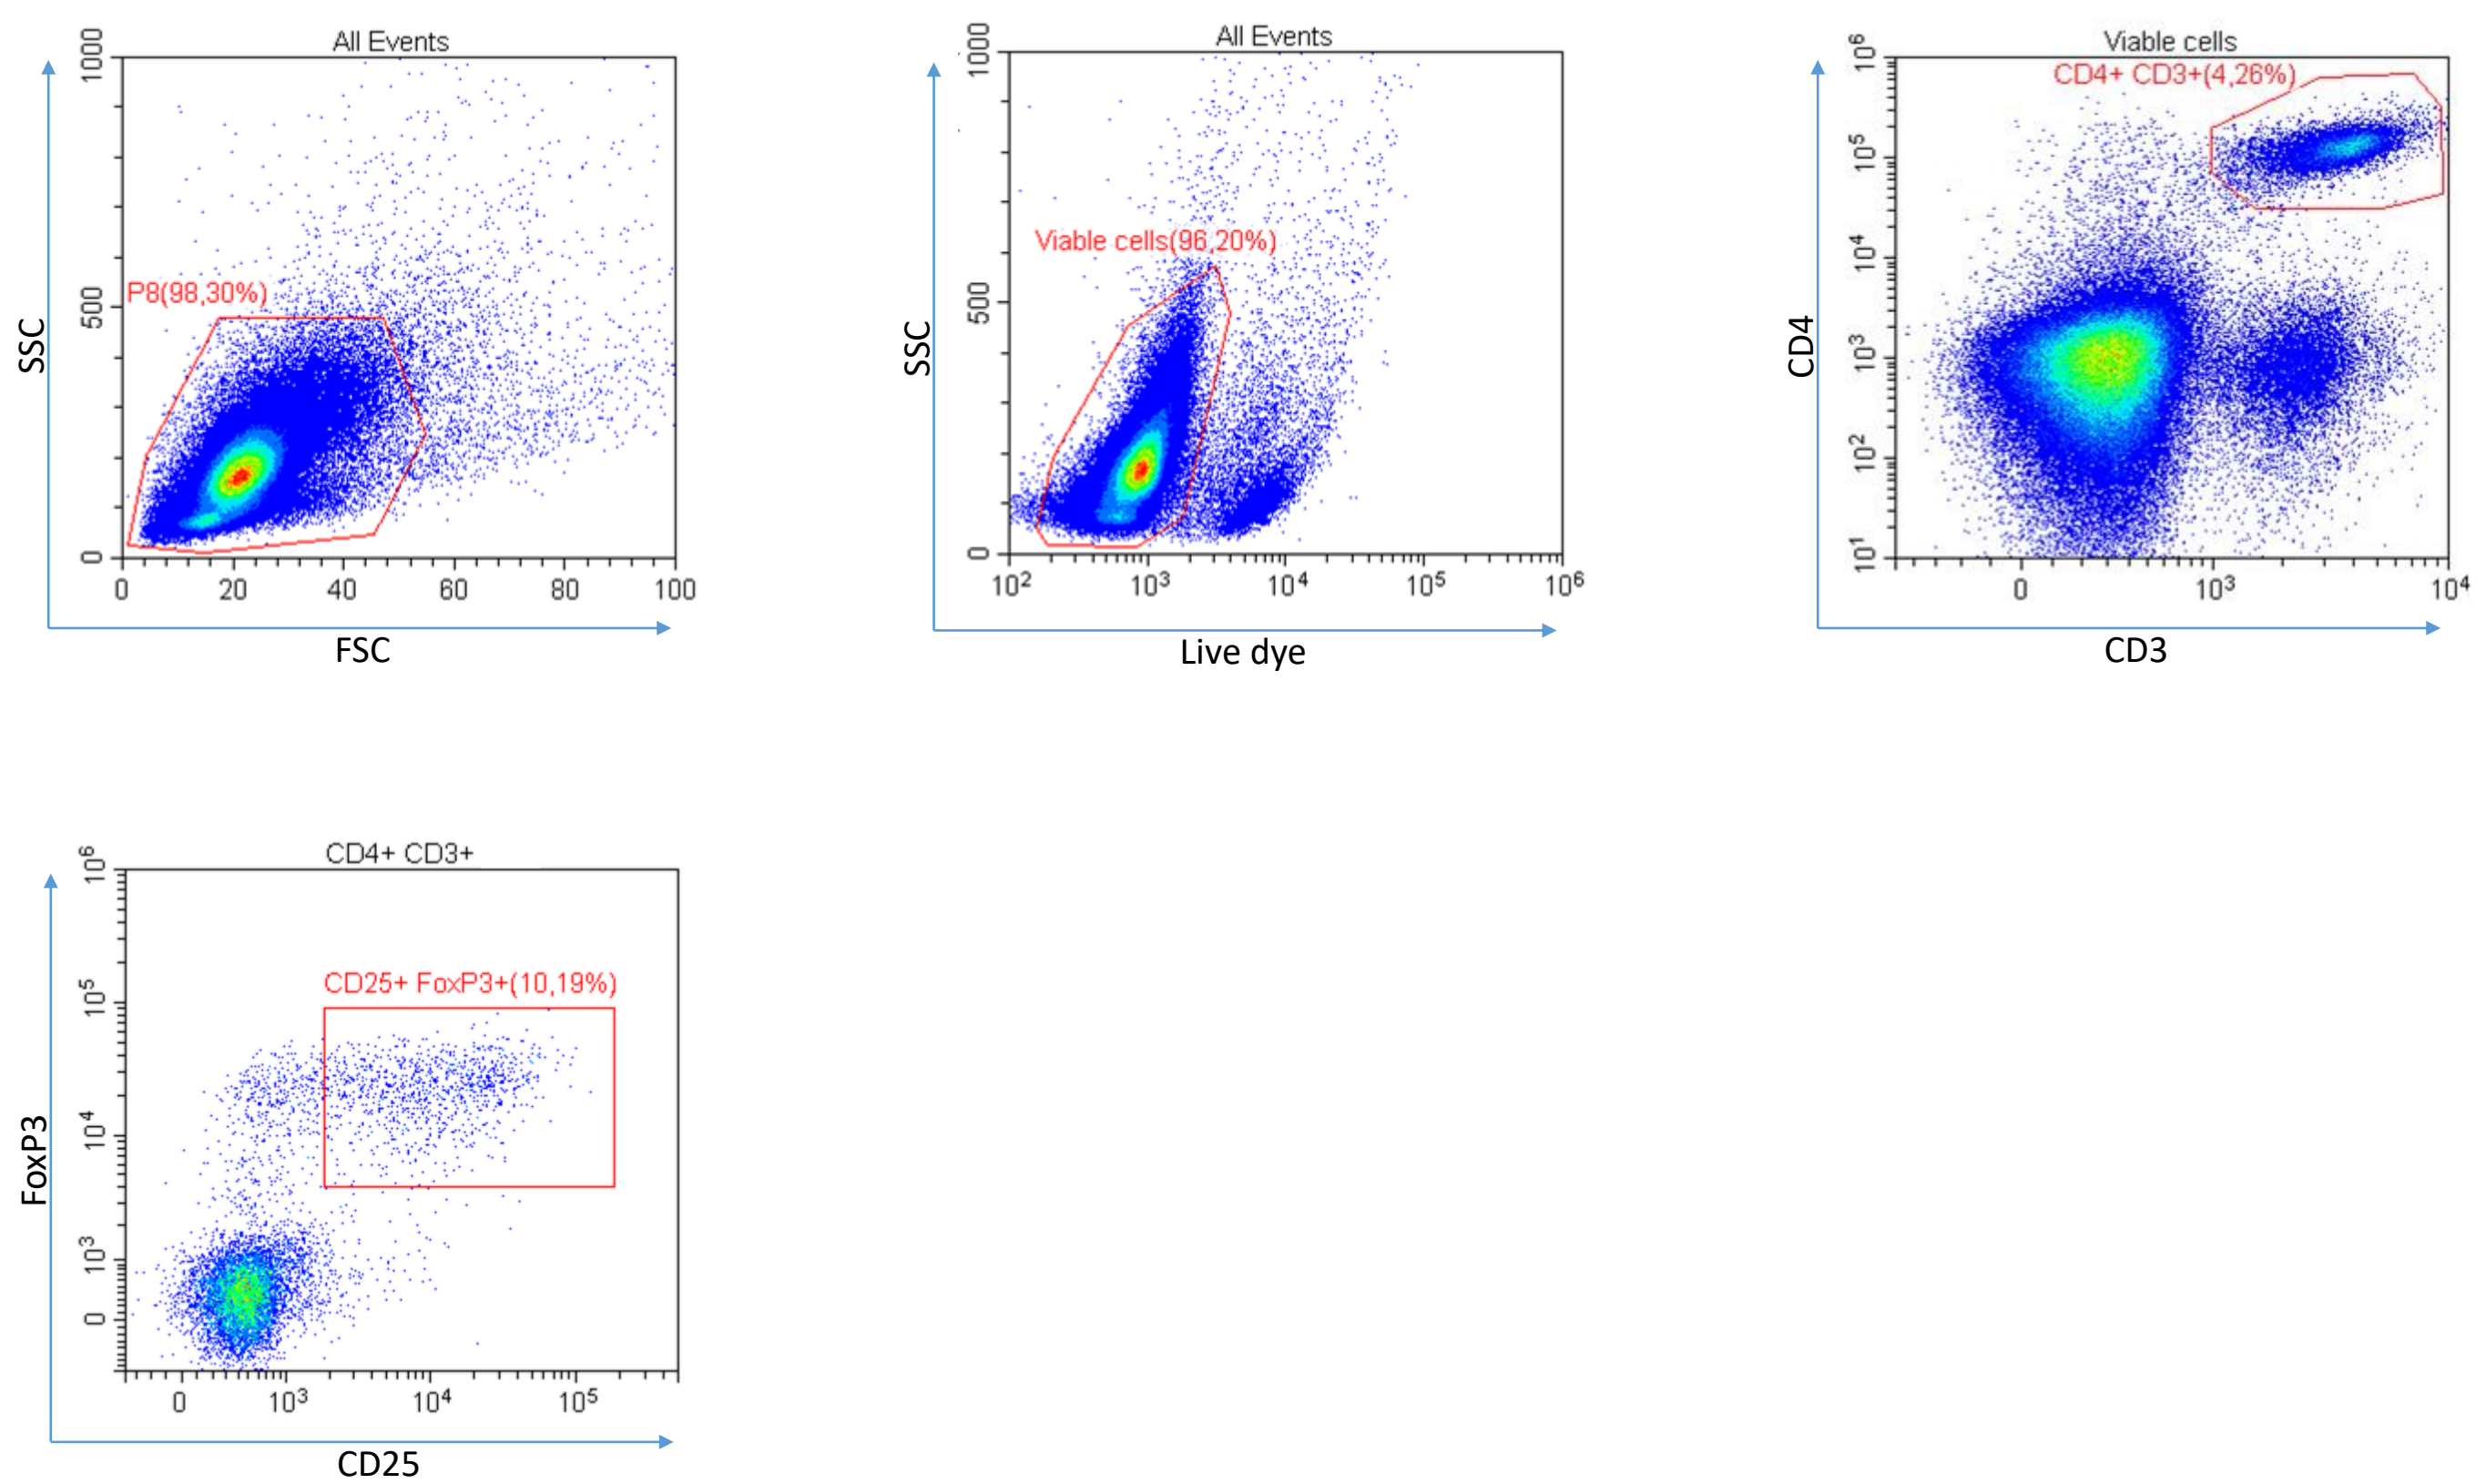

Suppl. Fig. 2: Gating strategy for analysis of CD4 CD15+ FoxP3+ Treg cells using FACS

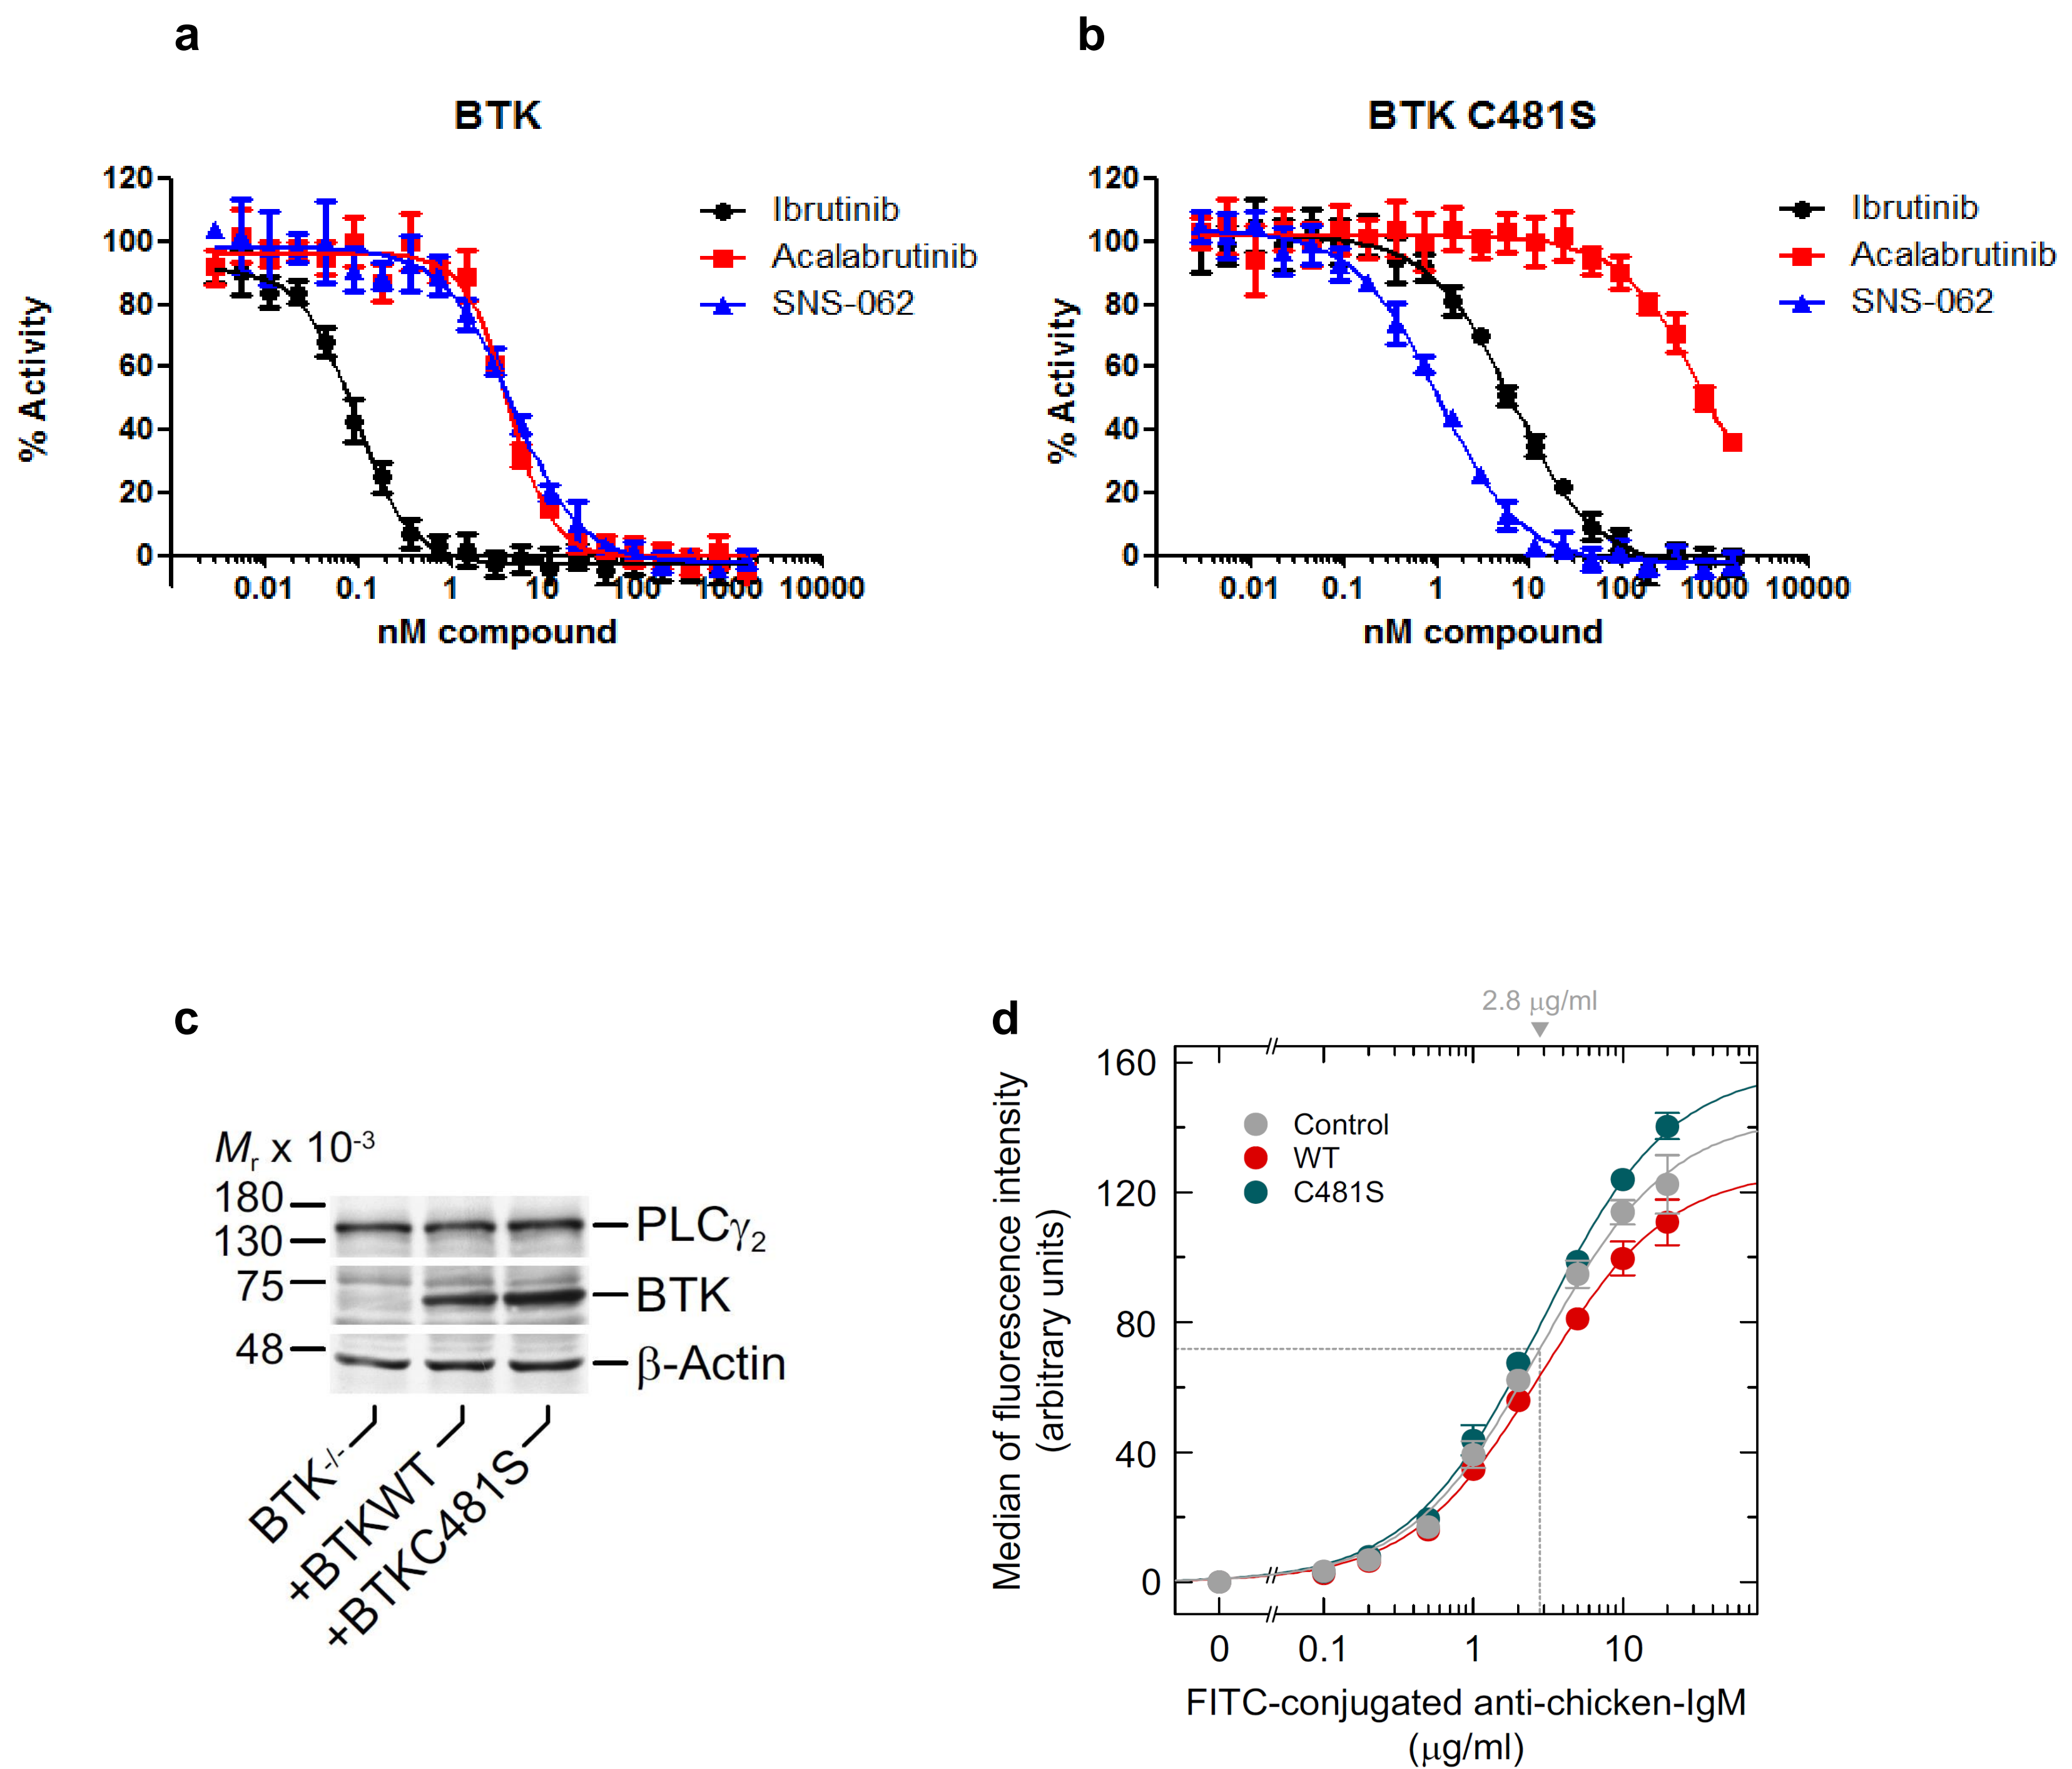

**Suppl. Fig. 3** Inhibition of kinase activity of (a) Wt and (b) C481S mutant BTK by ibrutinib, vecabrutinib and acalabrutinib, as measured by direct kinase assay. Error bars indicate standard deviation from biological replicates. (c) Representative western blot of BTK protein expression in BTK<sup>-/-</sup> DT40 cells prior to and following reconstitution with Wt or C481S mutant BTK. (d) Flow-cytometric analysis of BCR surface expression in BTK<sup>-/-</sup> DT40 cells and upon reconstitution with Wt or C481S mutant BTK. Fig c and d are representative figures of 3 biological replicates



## Suppl. Fig. 4

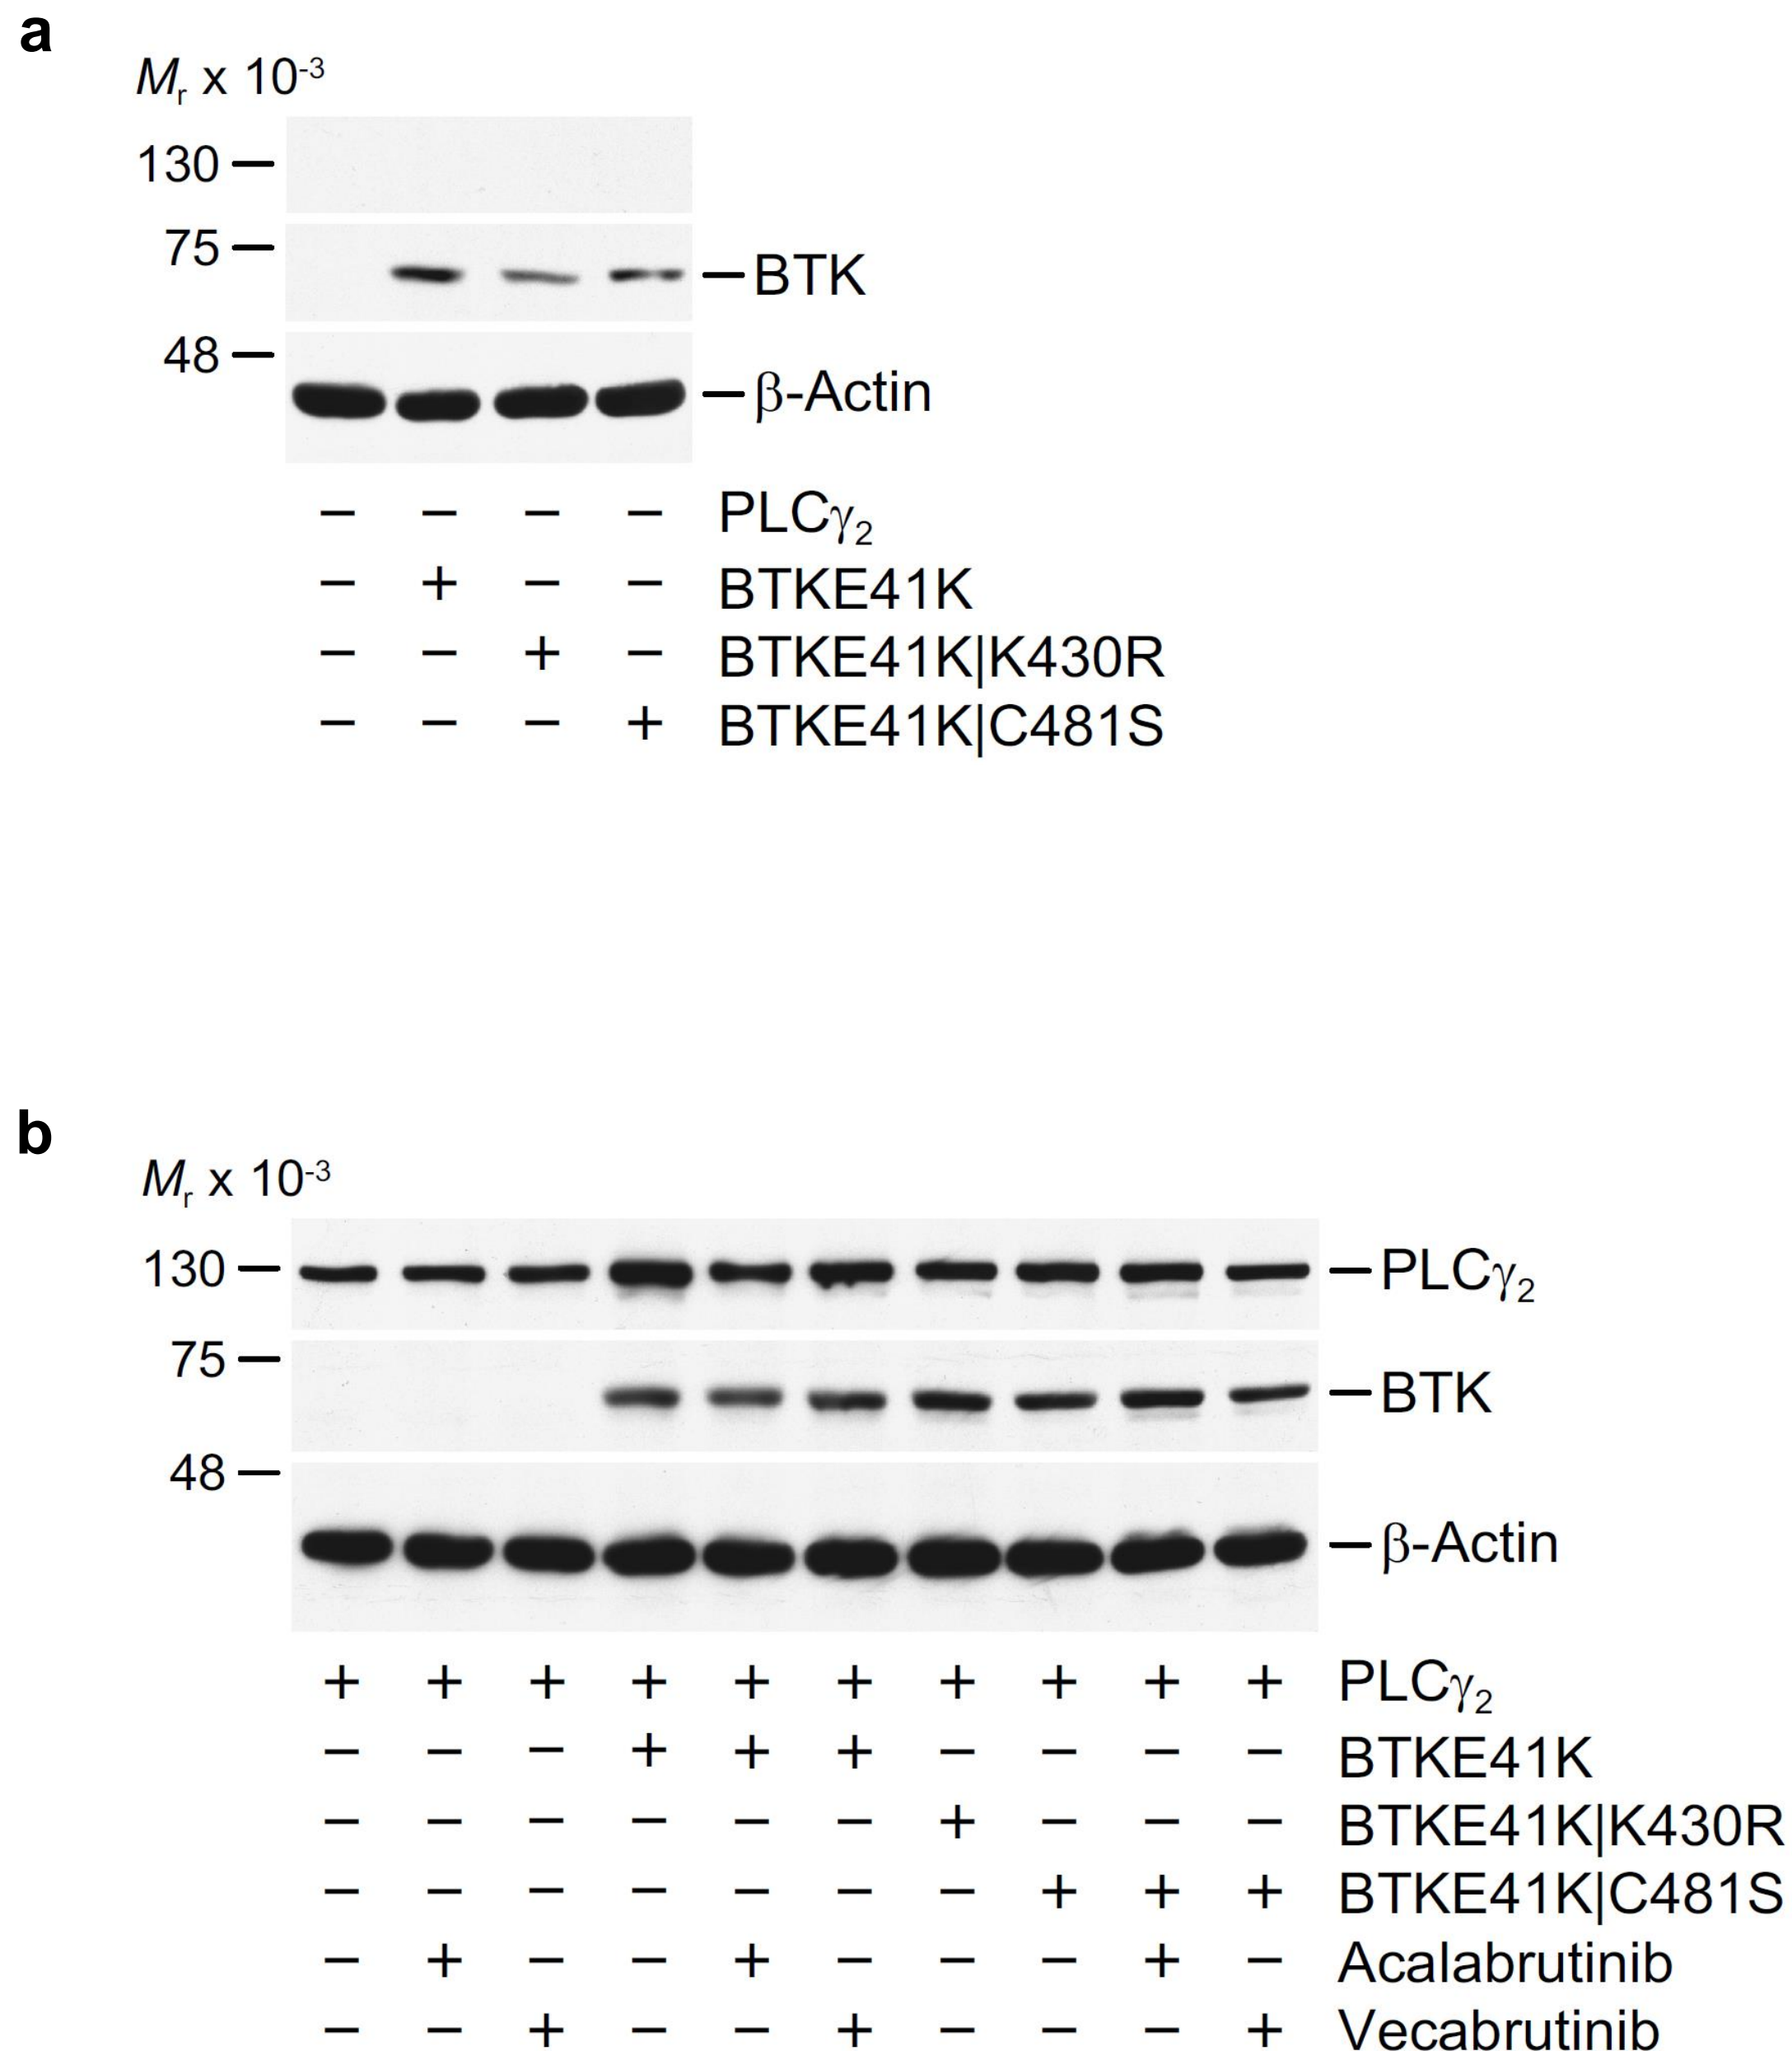

**Suppl. Fig. 4:** (a) Overexpression of the constitutively active E41K BTK mutant, alone or together with the K430R or C481S BTK mutants in COS-7 cells. (b) changes in BTK and PLC $\gamma_2$  expression upon acalabrutinib or vecabrutinib treatment of COS-7 cells overexpressing E41K BTK mutant, alone or in combination with the K430R or C481S BTK mutants. The western blots are representatives of 3 biological replicates.

## Suppl. Fig. 5

**a**

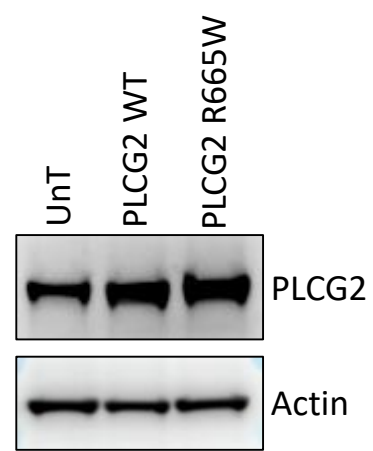

**b**

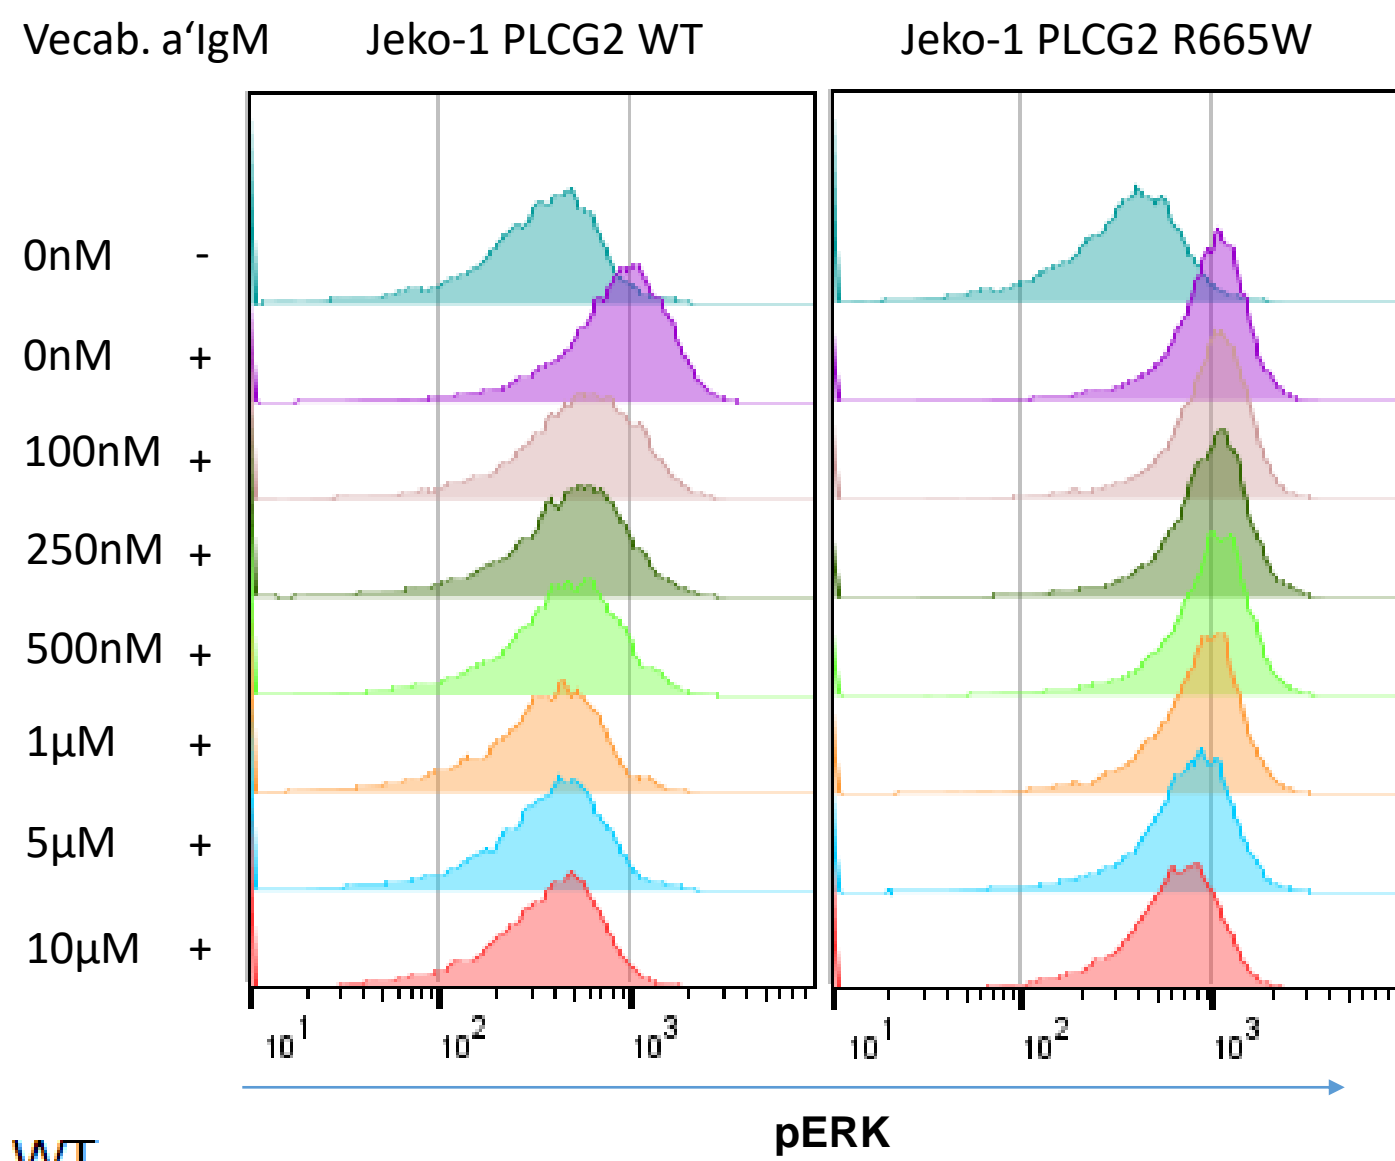

**c**

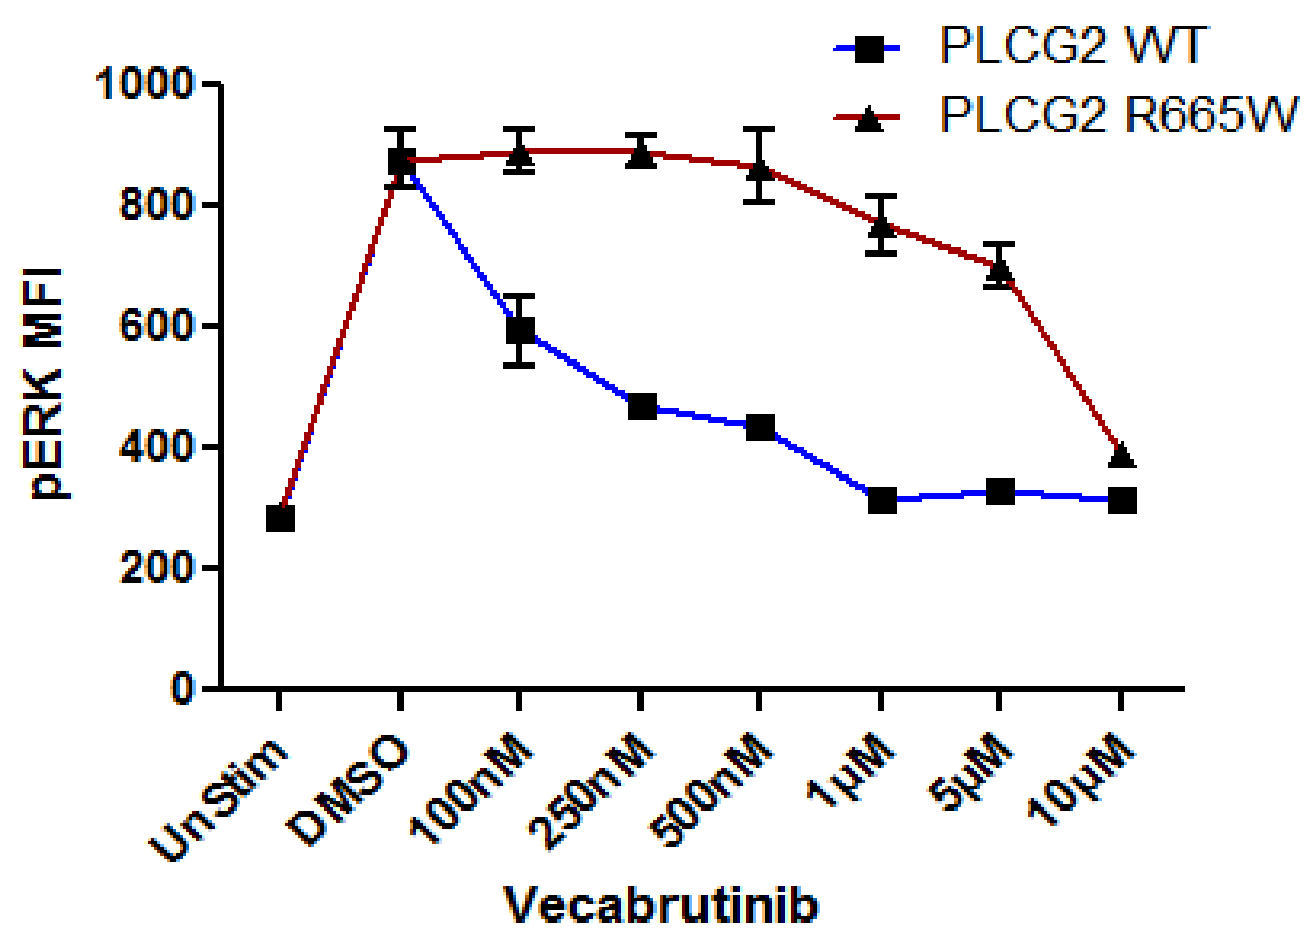

**d**

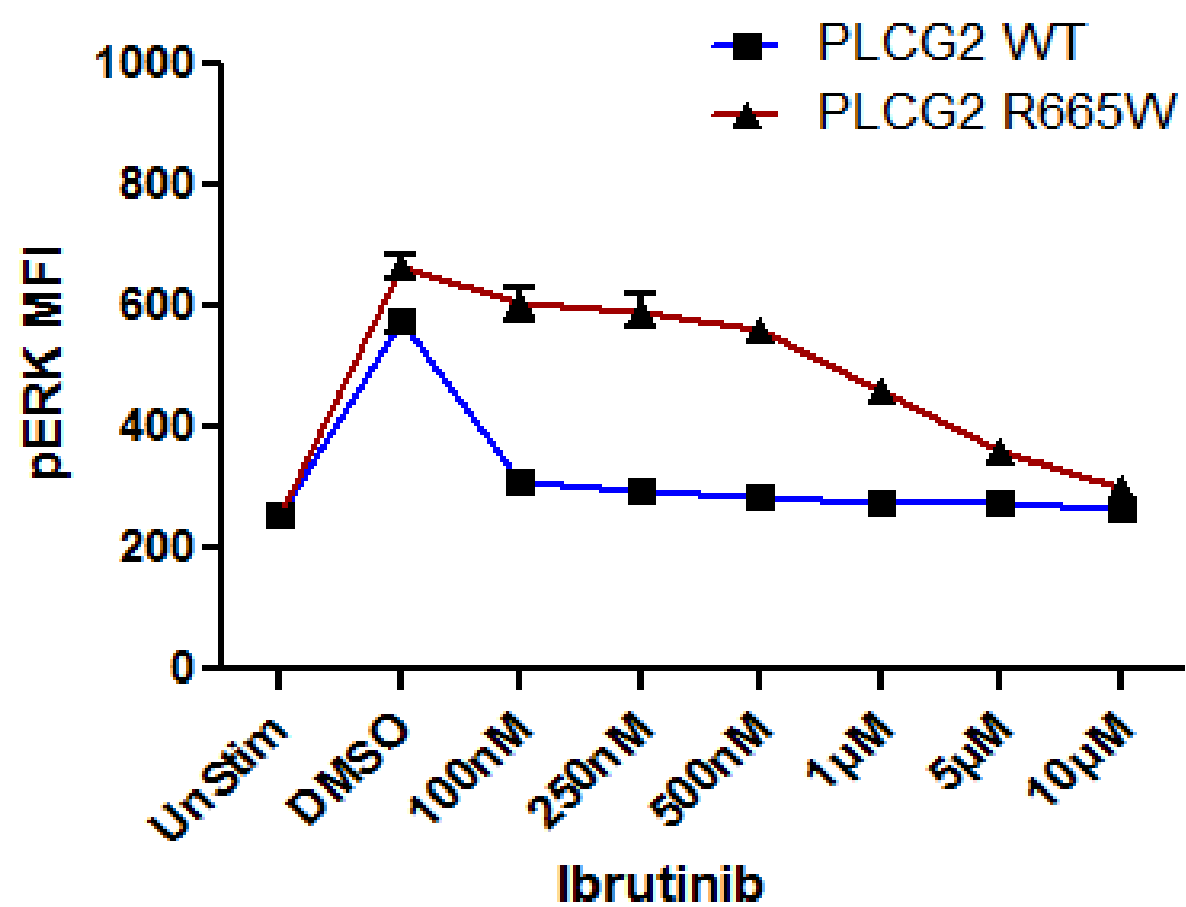

**Suppl. Fig. 5** (a) Western blot showing overexpression of Wt and R665W mutant PLCy2 in Jeko-1 cells. (b) Representative FACS plots showing changes in pERK levels upon stimulation with anti-IgM in cells pretreated with vecabrutinib. (c) Similar to ibrutinib, vecabrutinib treatment led to a decrease in pERK only at high concentrations in R665W PLCy2 mutant expressing cells. All data presented here are representative of more than 3 biological replicates.

Suppl. Fig. 6

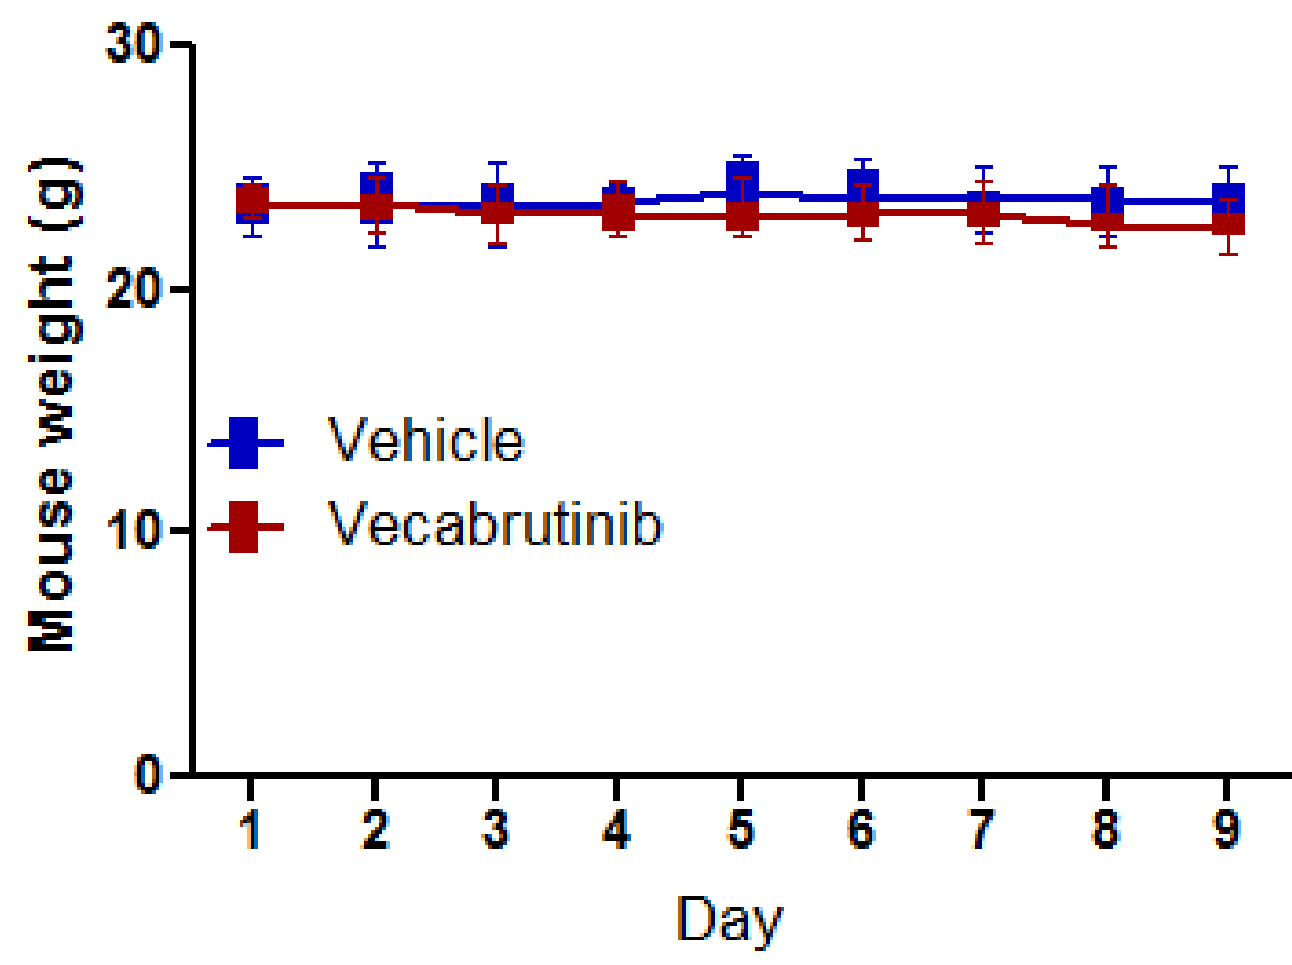

Suppl. Fig. 6: Weights of mice treated with vecabrutinib vs. vehicle

Suppl. Fig. 7

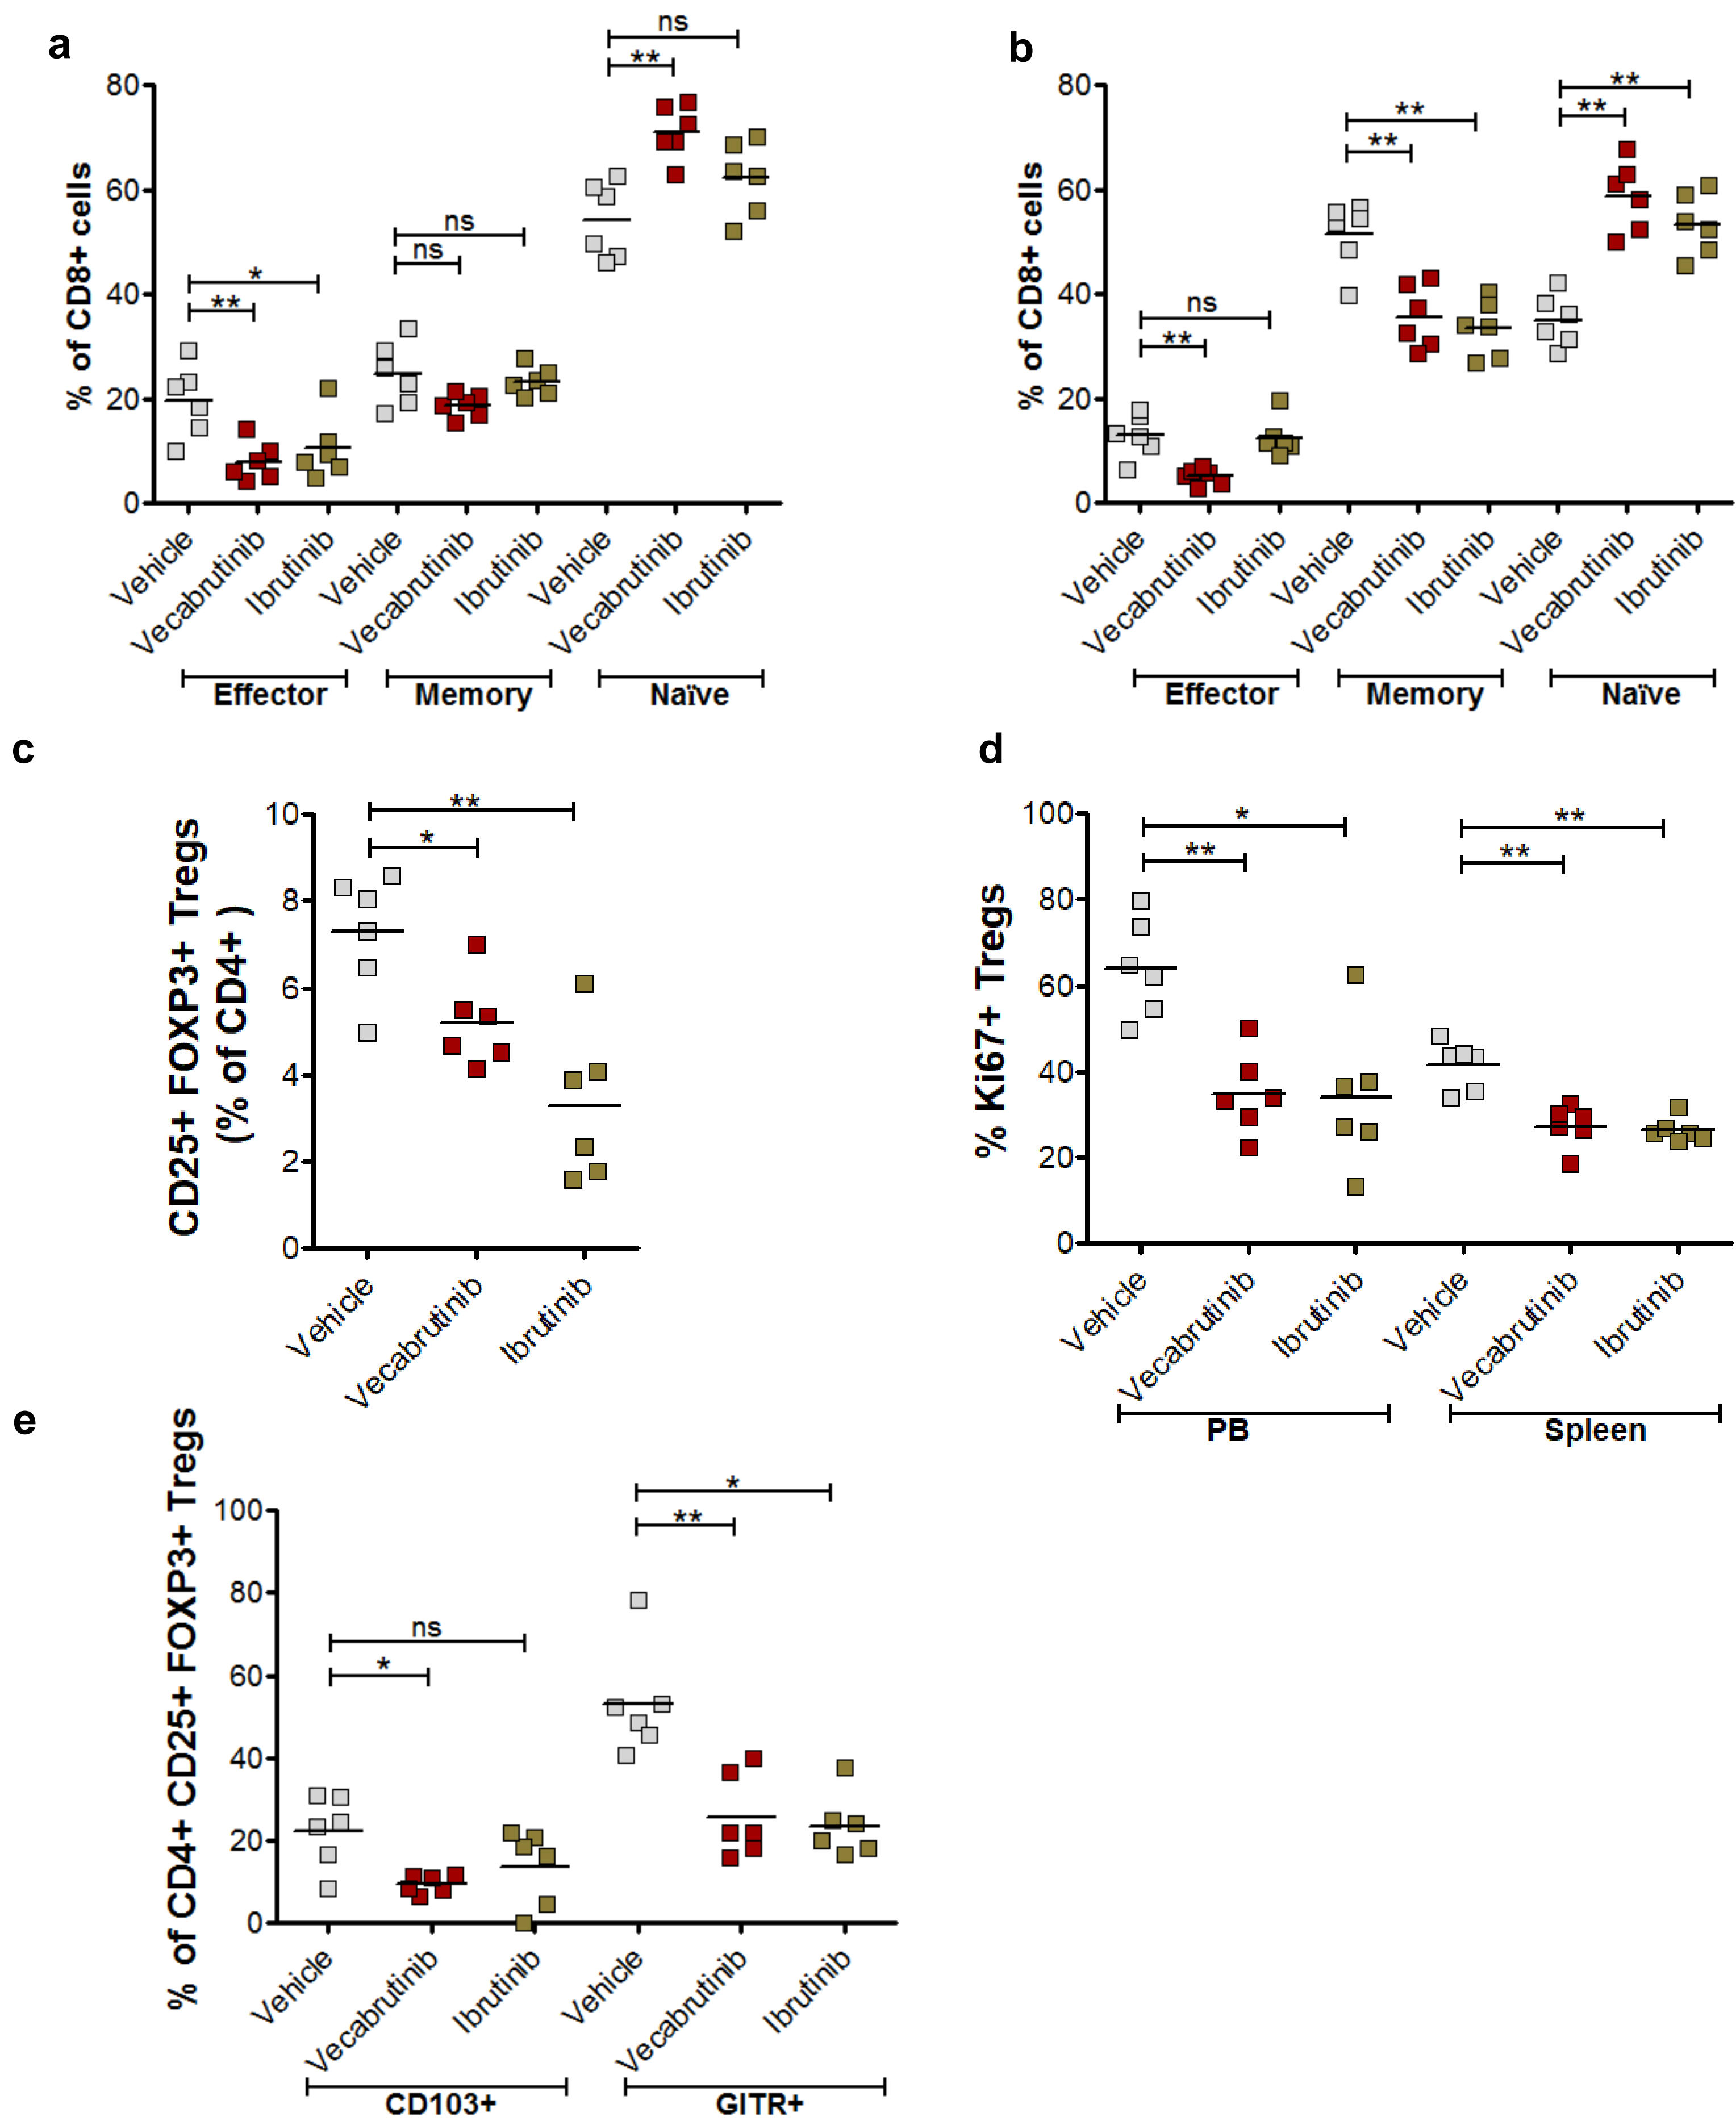

**Suppl. Fig. 7:** Changes in effector ( $CD127^{low} CD44^{int-hi}$ ) and memory ( $CD44+ CD127+$ ) and naïve ( $CD44- CD127+$ ) T-cell populations in (a) peripheral blood and (b) bone marrow; and (c) changes in  $CD4+ CD25+ FoxP3+$  regulatory T cells (Tregs) in peripheral blood upon treatment with vecabrutinib, ibrutinib or vehicle. (d) Proliferation (% Ki67+) of Tregs in peripheral blood and spleen upon treatment with the inhibitors compared to vehicle. (e) Expression of CD103 and GITR by Tregs in peripheral blood upon vecabrutinib, ibrutinib or vehicle treatments.

# Suppl. Fig. 8

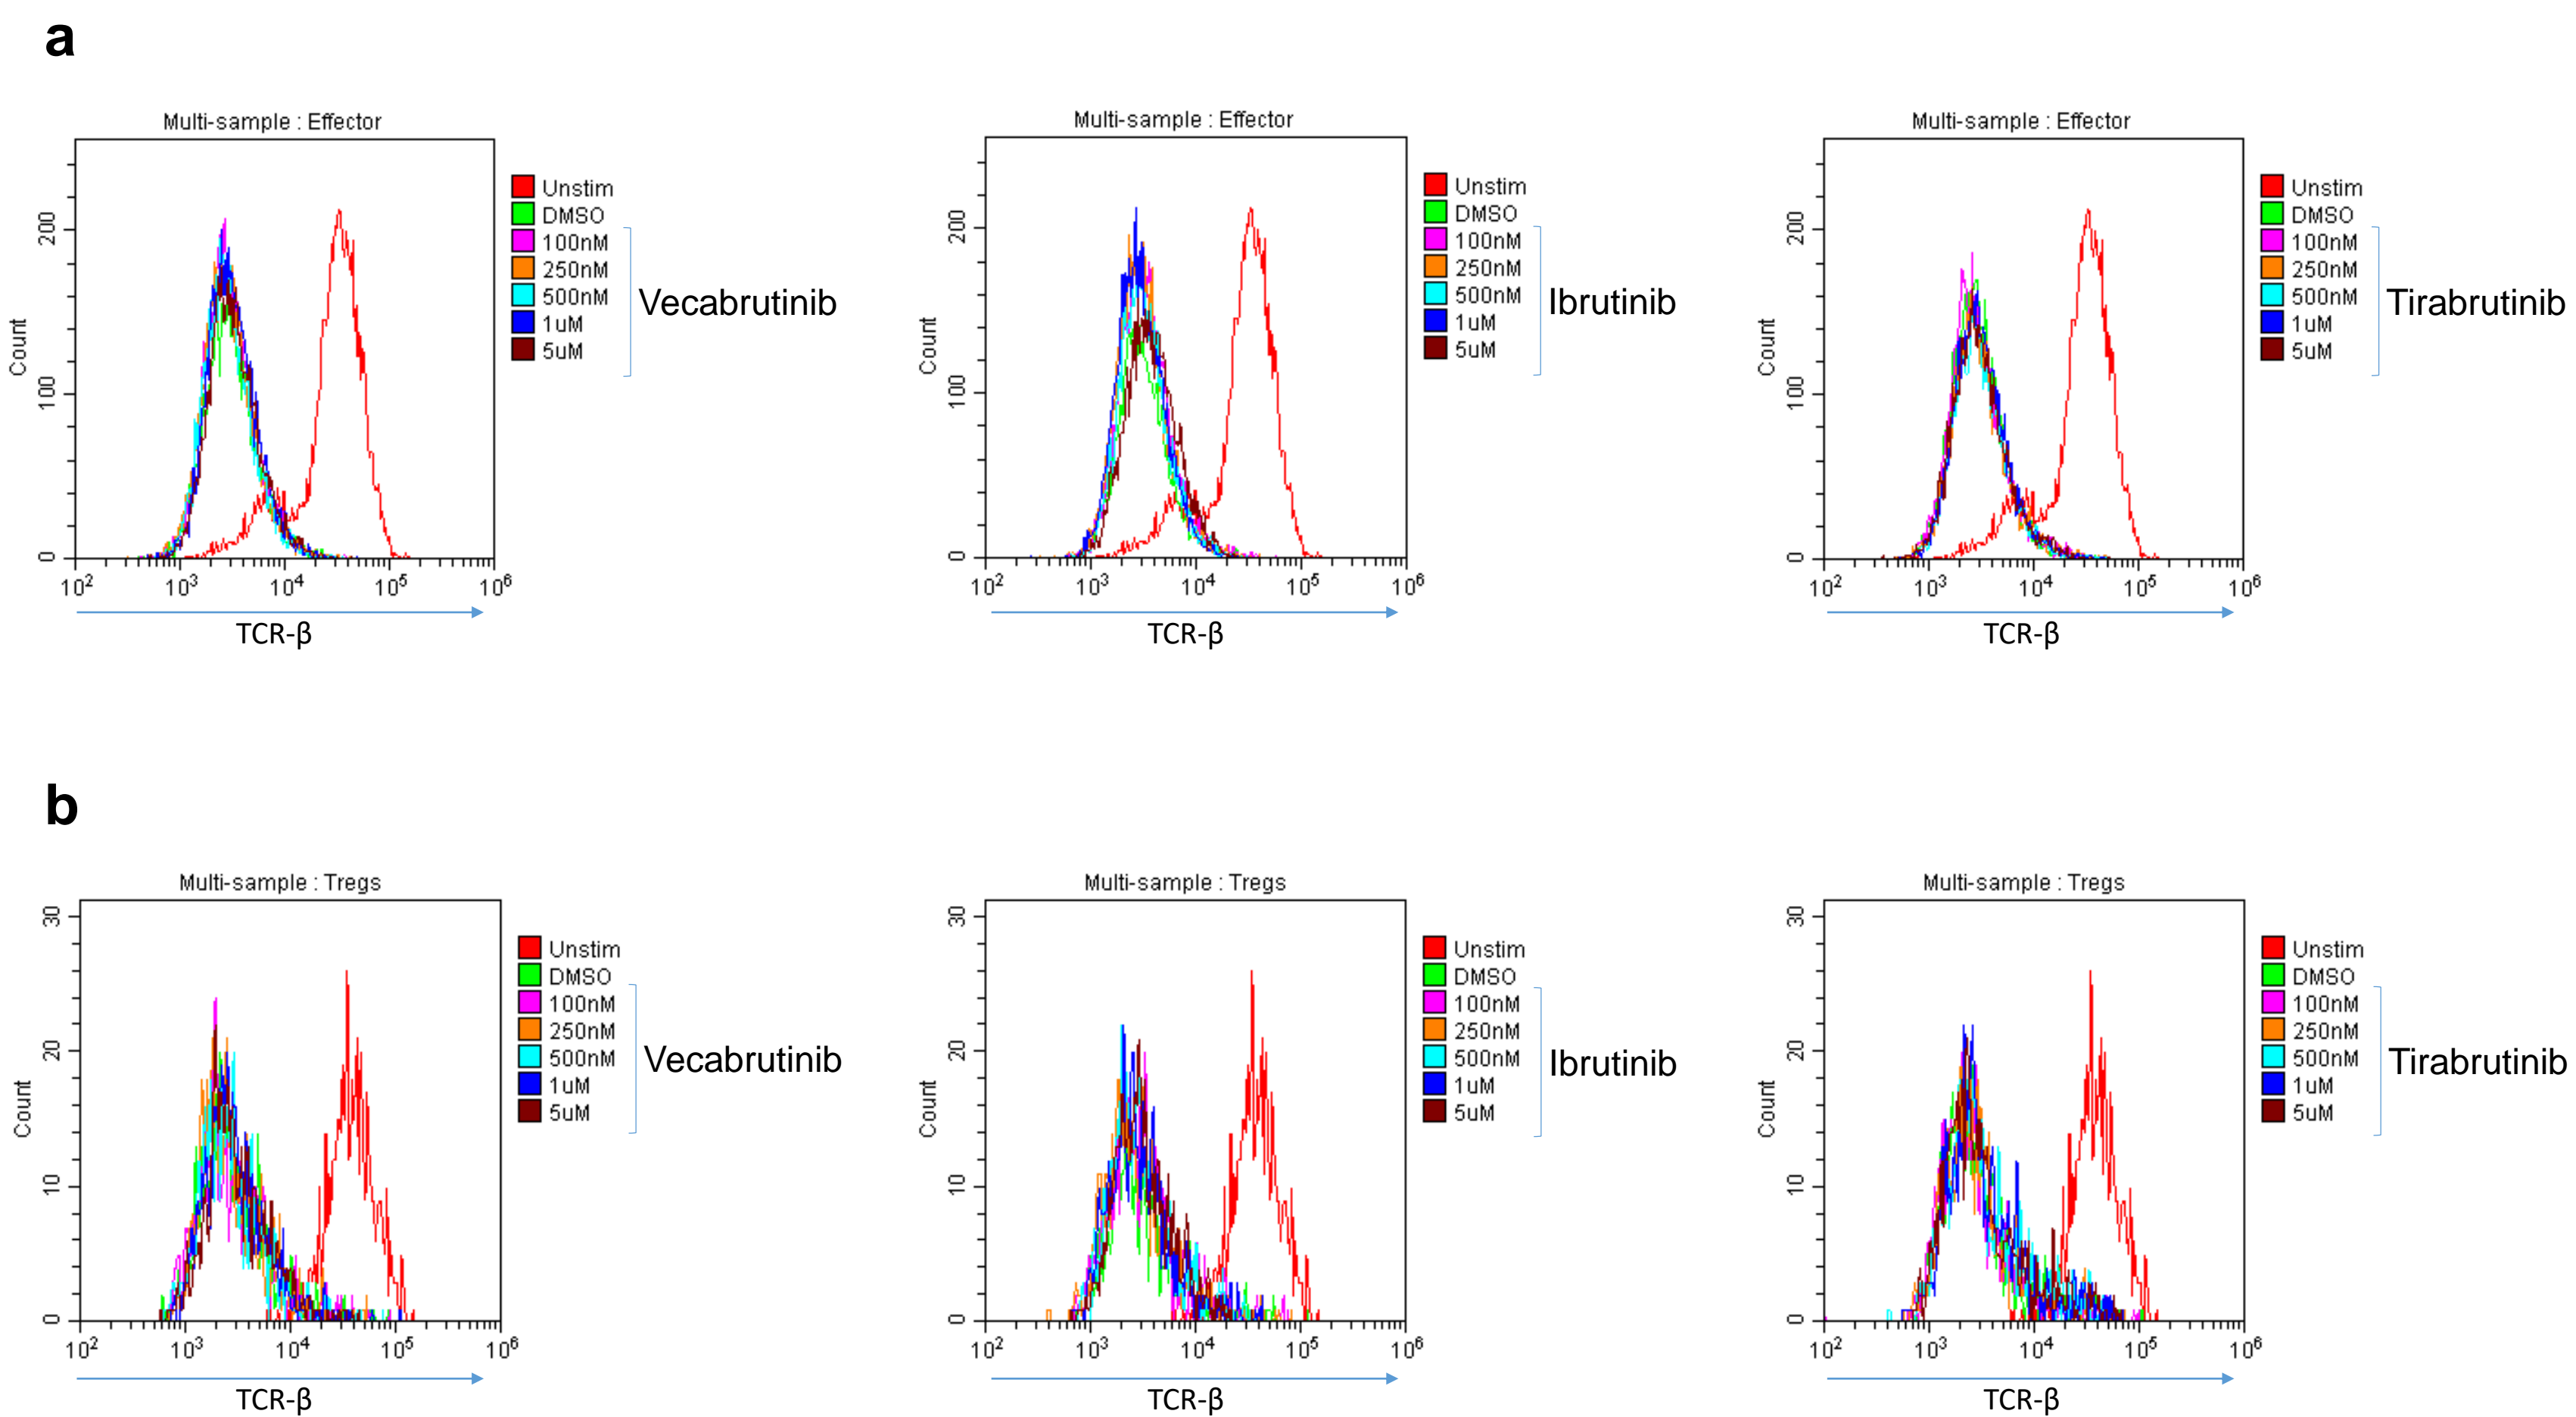

**Suppl. Fig. 8:** Representative FACS plot showing changes in TCR-beta expression in (a) CD8+ effector ( $CD127^{low} CD44^{int-hi}$ ) and (b) CD4+ CD25+ FoxP3+ regulatory T cells (Tregs) in splenocytes following pre-treatment with different doses of vecabrutinib, ibrutinib and tirabrutinib, followed by stimulation of TCR using anti-CD3 antibody.



# Suppl. Fig. 9

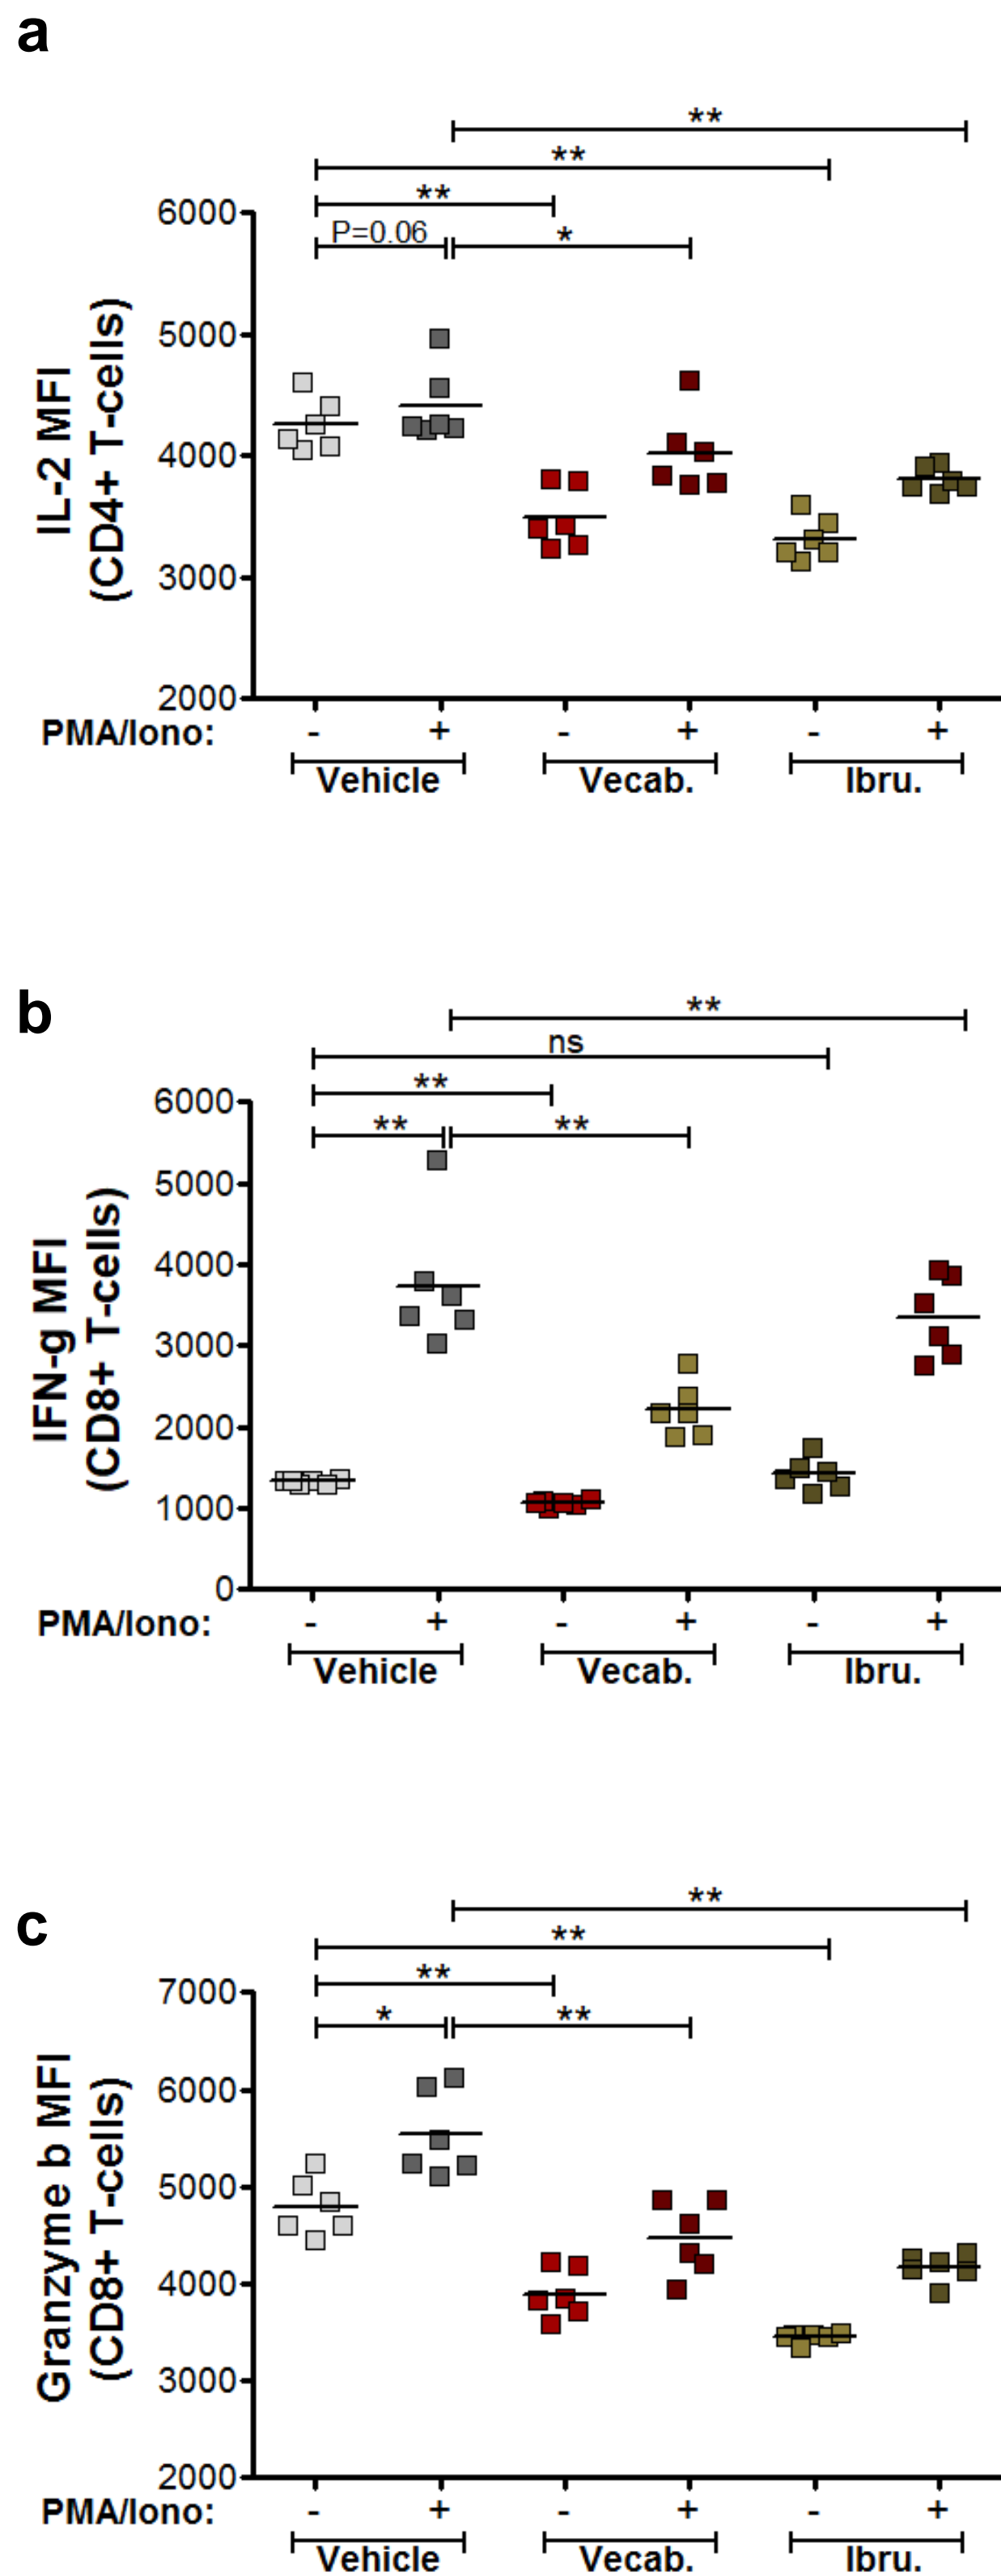

**Suppl. Fig. 9** Functional assessment of splenic CD8+ T-cells isolated following 10 days of treatment with vehicle, vecabrutinib or ibrutinib treated mice and stimulated with PMA/Ionomycin measured by production of: (a) IL-2 by CD4+ T-cells (b) IFN-g and (c) Granzyme b by CD8+ T-cells.



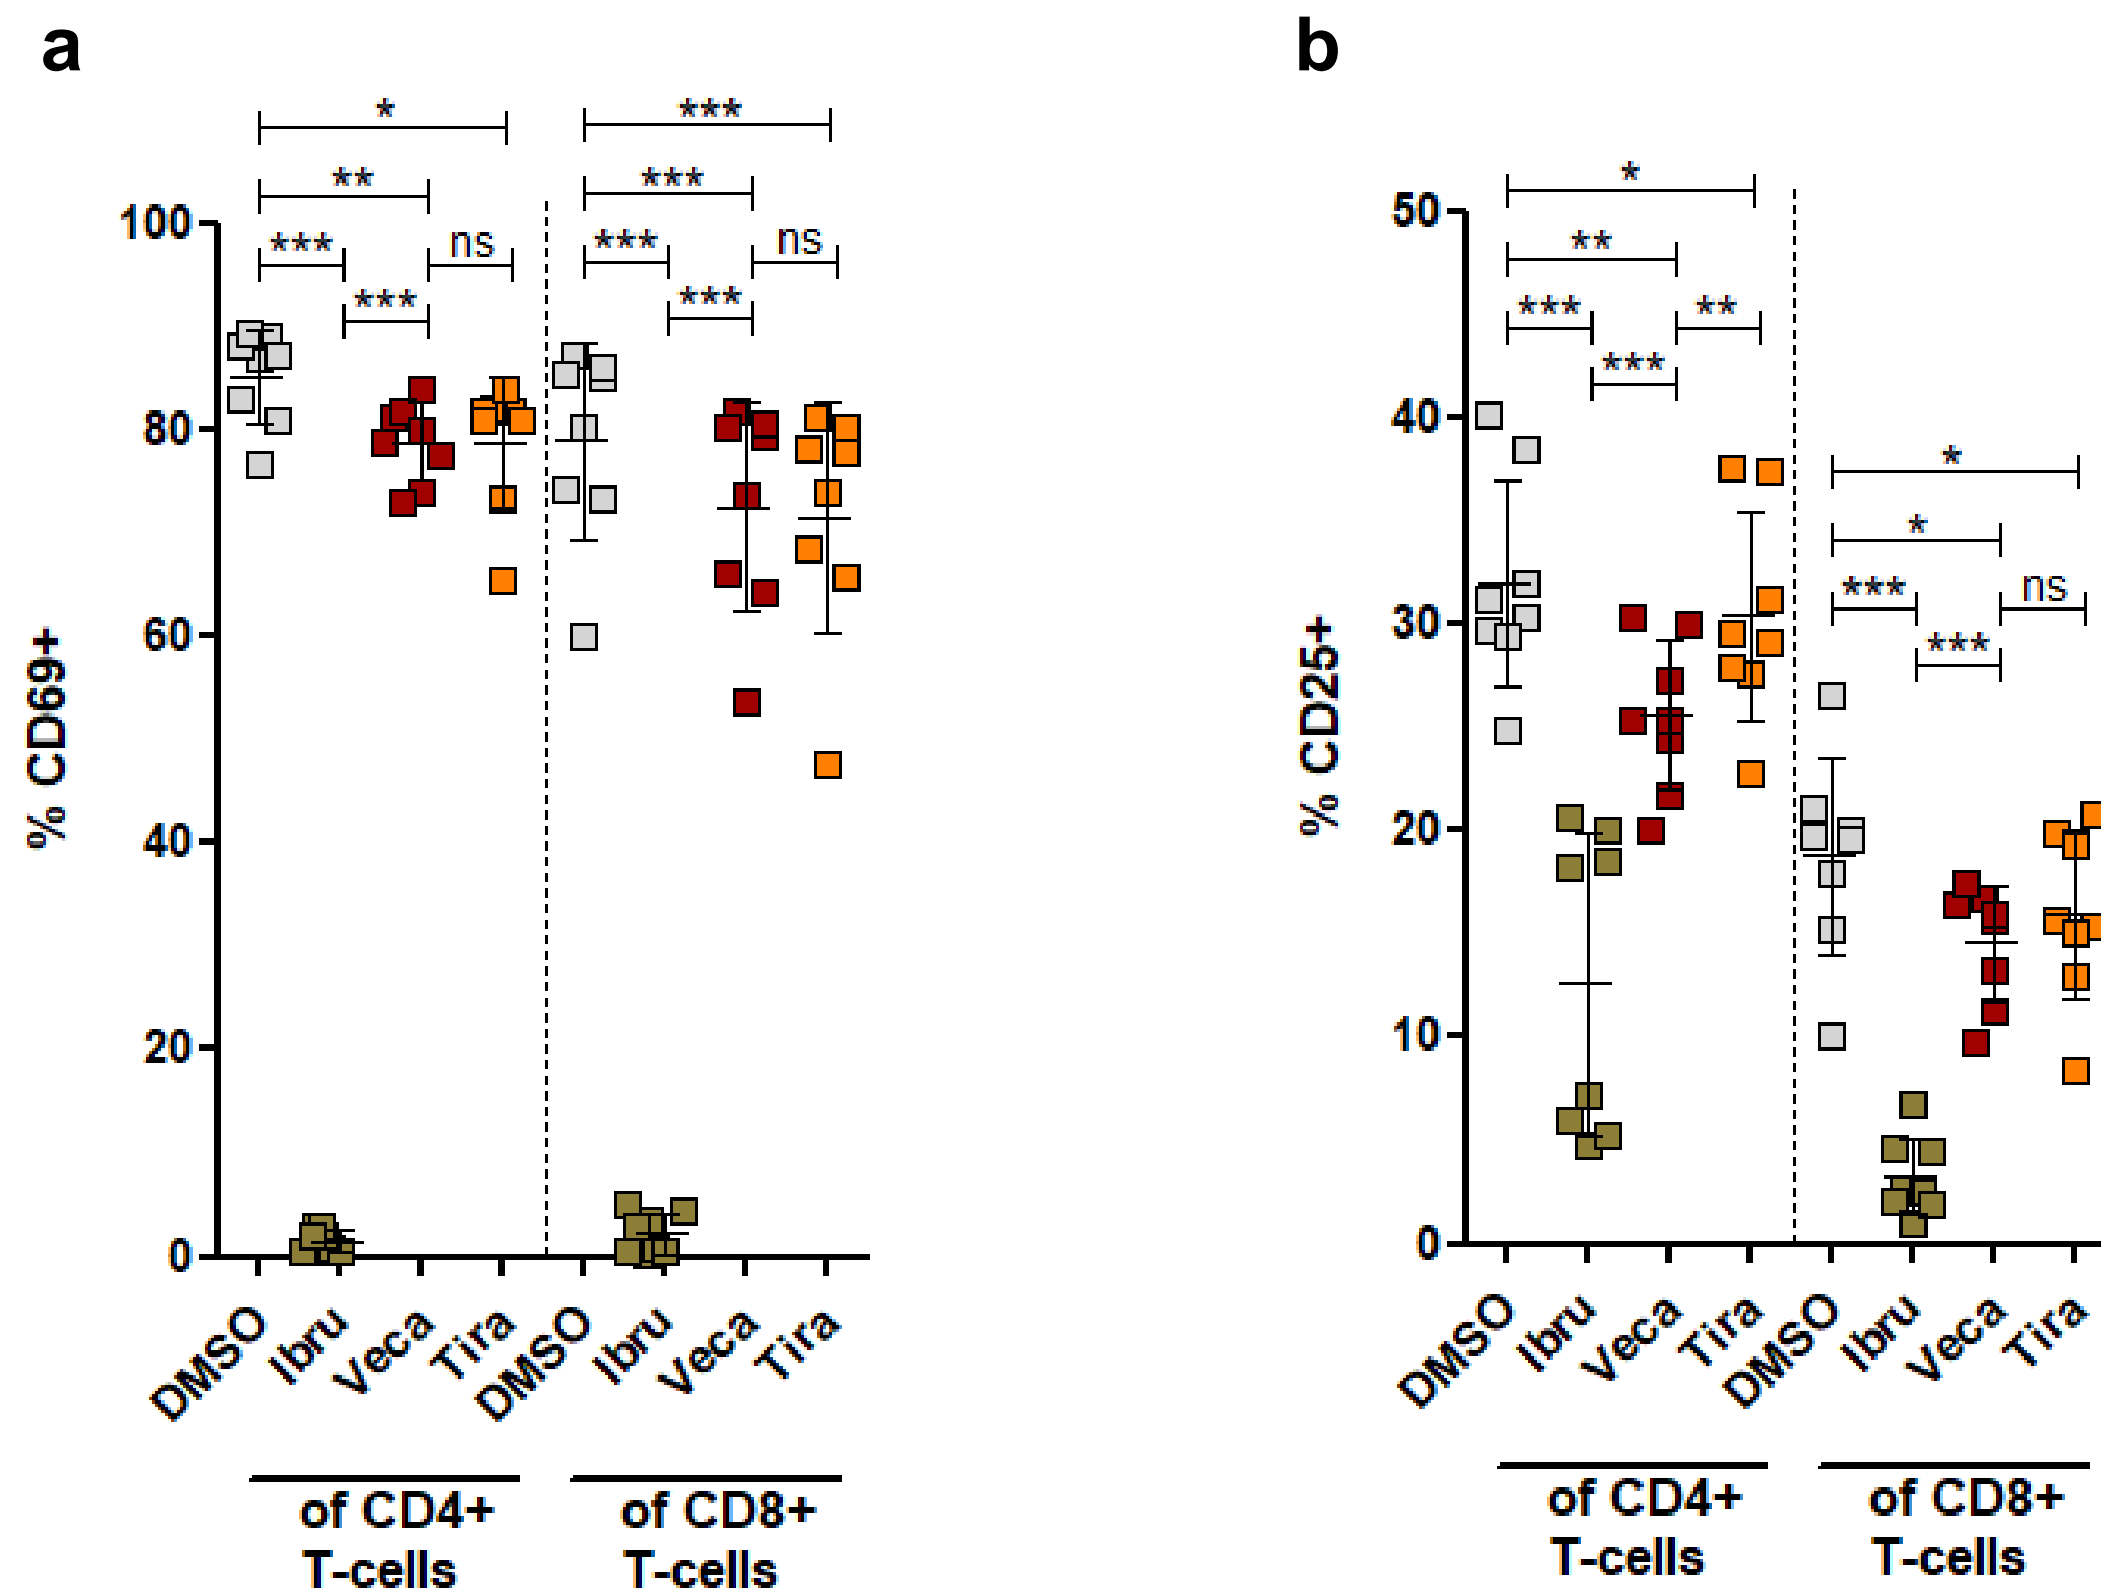

**Suppl. Fig. 10:** T-cell activation measured by (a) relative expression of CD69 and (b) relative expression of CD25 on human T-cells isolated from healthy individuals, treated ex vivo with DMSO or 5 $\mu$ M of ibrutinib, vecabrutinib or tirabrutinib, and stimulation with anti-CD3/CD28 beads for 6 hours.

Suppl. Fig. 11:

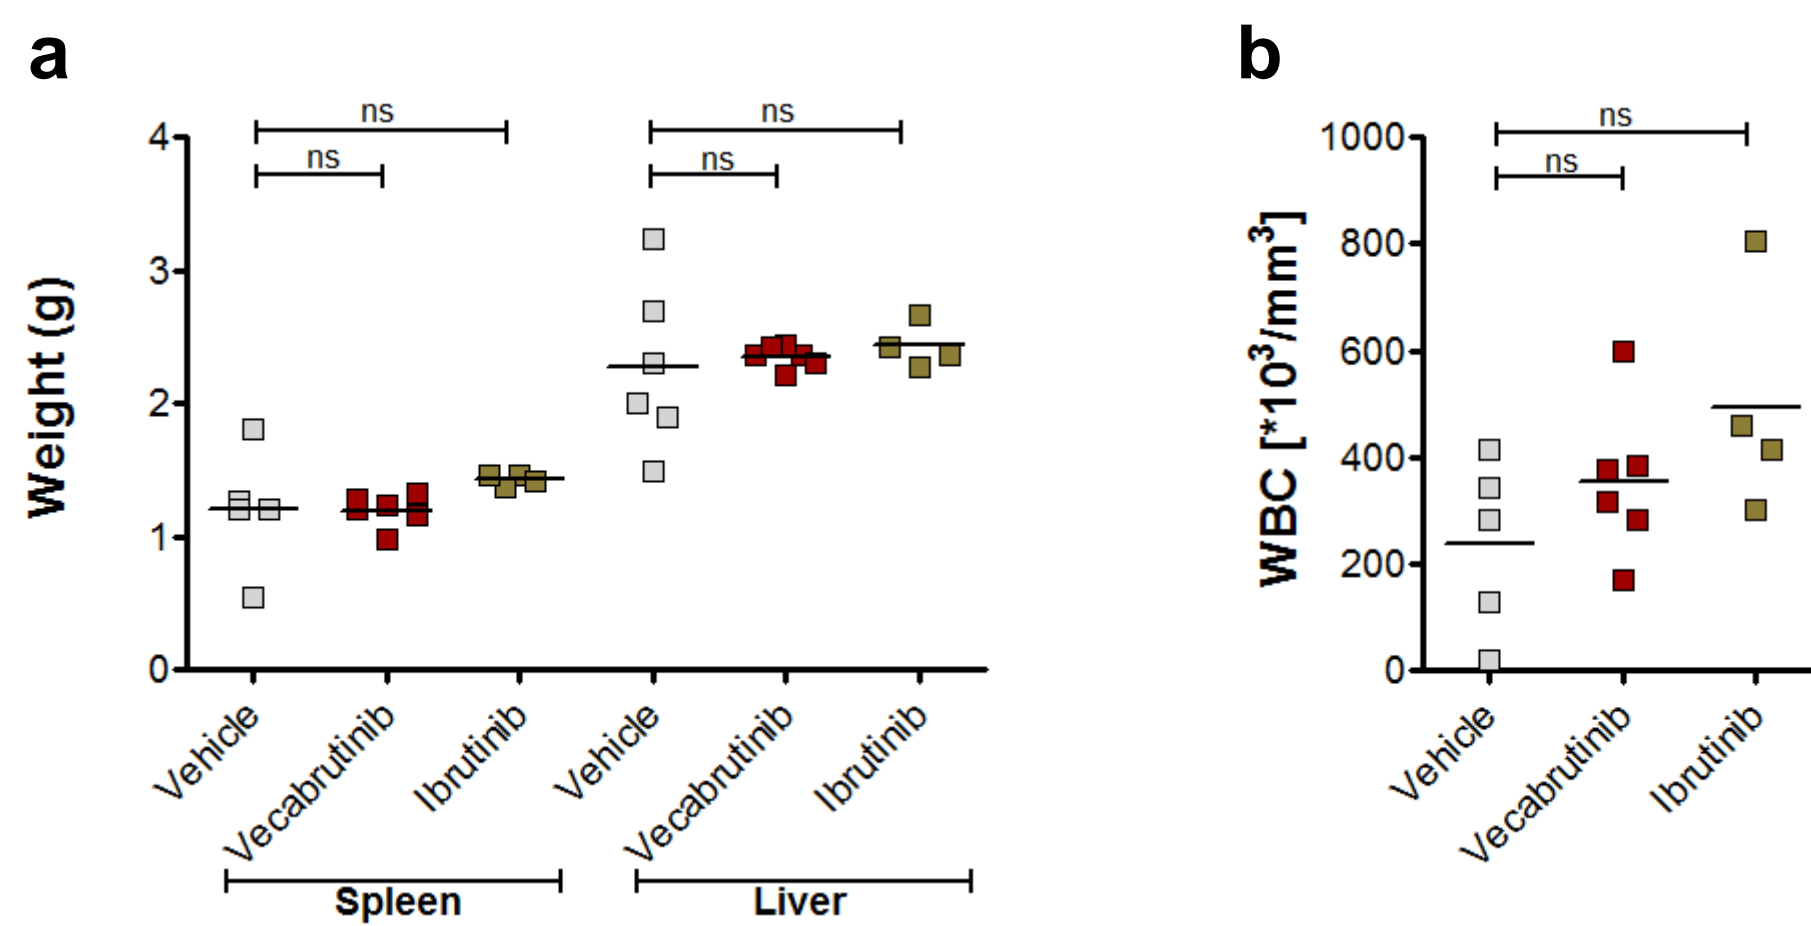

**Suppl. Fig. 11:** Analysis of (a) spleen, liver weights and (b) WBC count of mice from the survival analysis (Fig. 5a)



**Suppl. Fig. 13:**

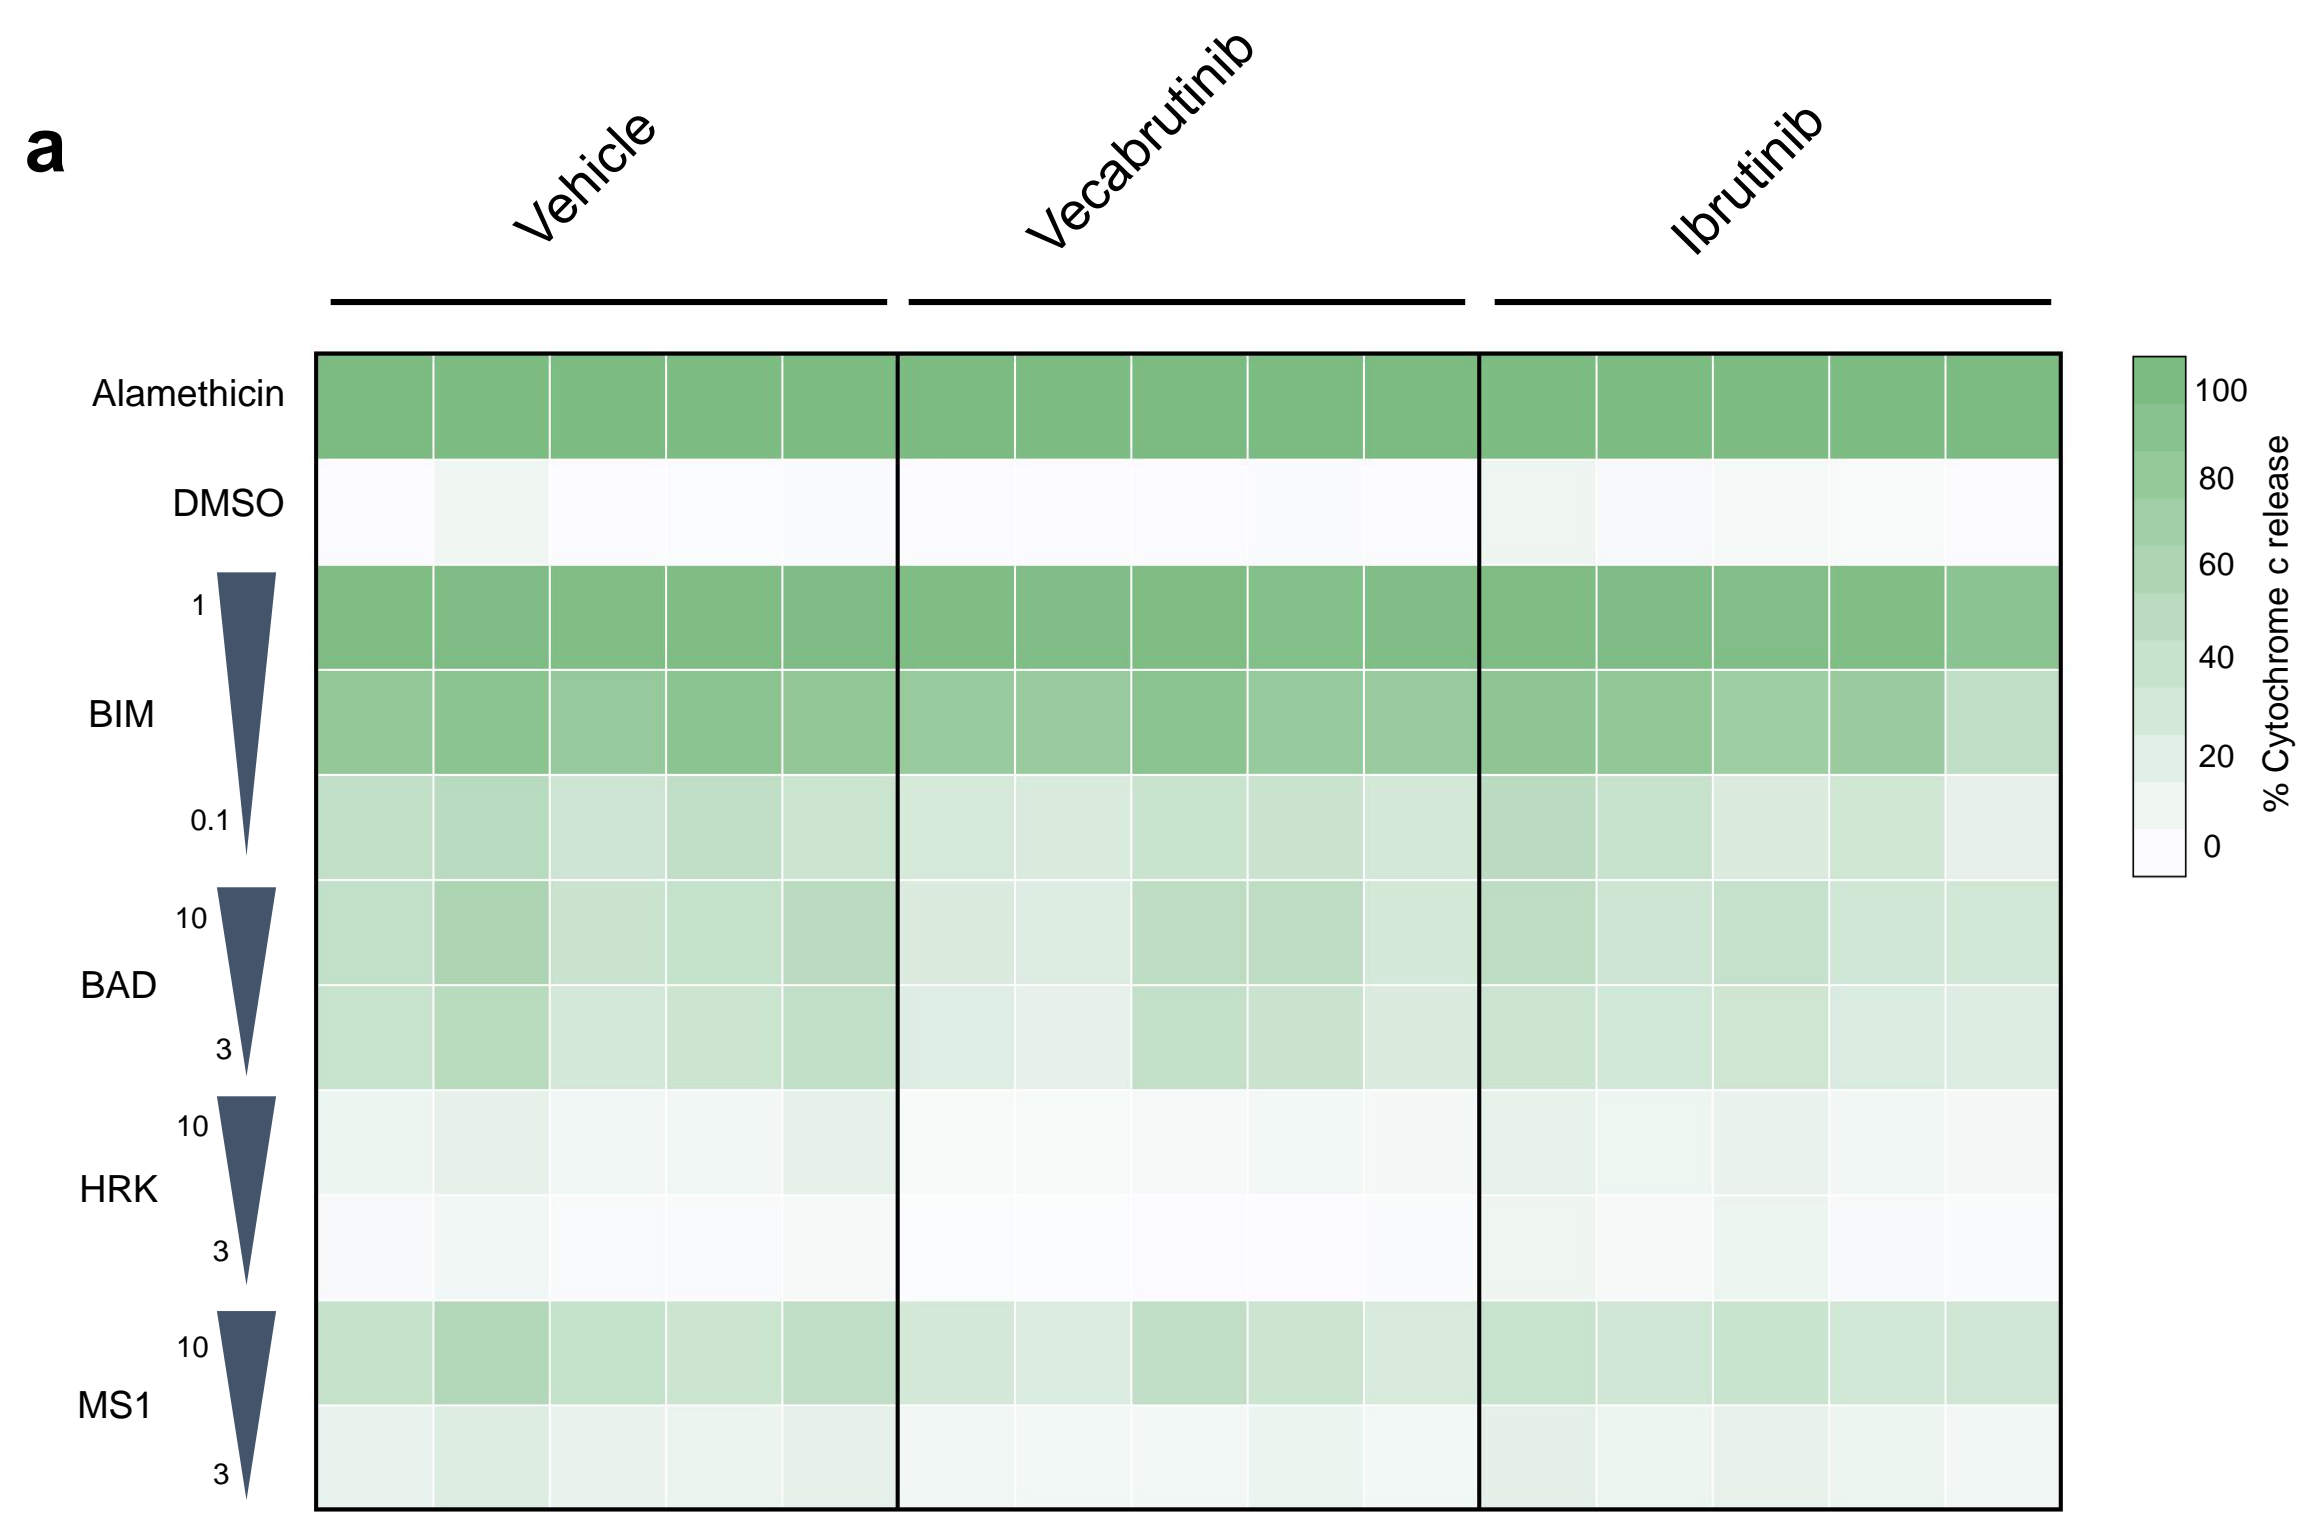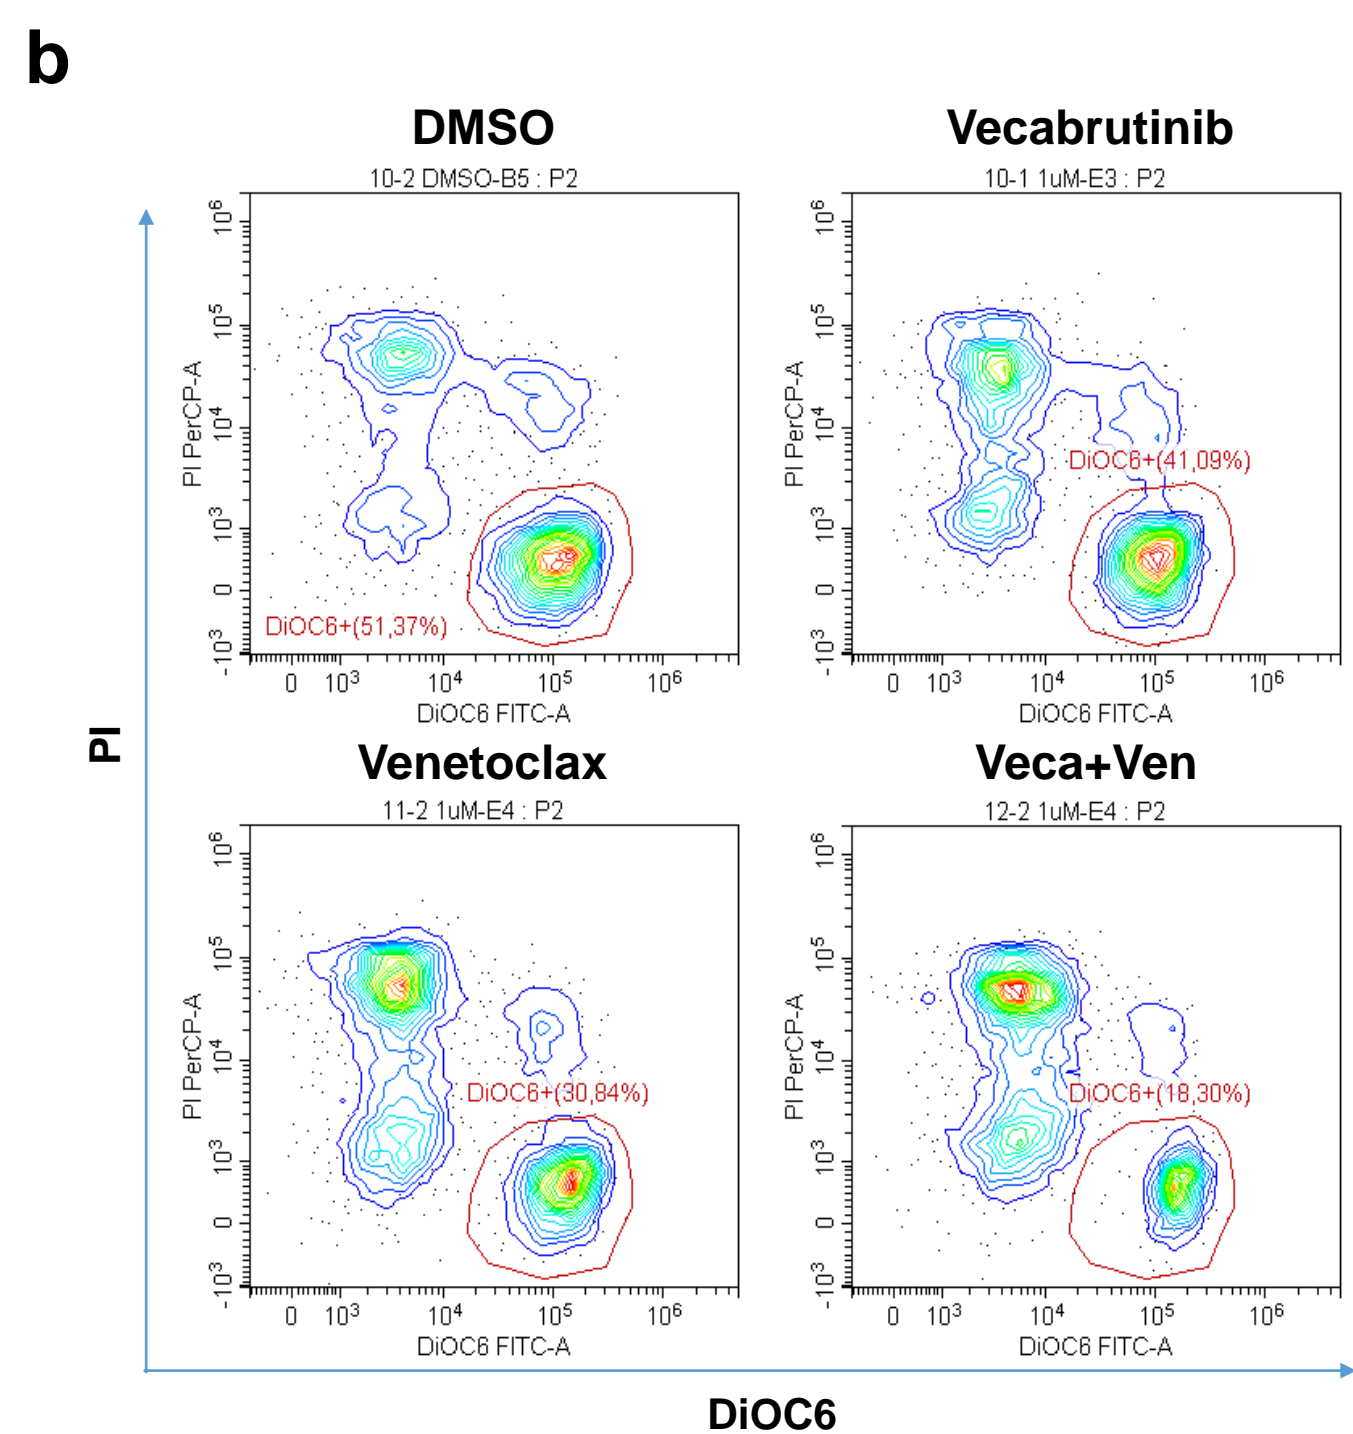

**Suppl. Fig. 13:** (a) Heatmap of baseline mitochondrial BH3 profiling in the murine E $\mu$ -TCL1 model after treatment with vehicle control, vecabrutinib or ibrutinib. (b) Representative FACS plots showing *ex vivo* drug sensitivity measurement using DiOC6/PI FACS staining.
